# Supplementary material for: Associations of dietary factors and xenobiotic intake with faecal microbiota composition according to the presence of intestinal mucosa damage
Source: Royal Society of Chemistry journal article supplement (doi:10.1039/d3fo01356a), 2023-01-01
Supplement: d3fo01356a1.pdf [file d3fo01356a1.pdf]

**Supplementary information**

**Table S1.** Microbial abundance and faecal SCFAs, amino acids, biogenic amines and ammonium concentrations according to clinical diagnosis group.

|                                     | Control (n=25) | Polyps (n=35) |
|-------------------------------------|----------------|---------------|
| Microbial families (% Abundance)    |                |               |
| Bifidobacteriaceae                  | 13.05 ± 13.25  | 11.13 ± 11.83 |
| Peptostreptococcaceae               | 6.04 ± 8.06    | 5.12 ± 5.30   |
| Prevotellaceae                      | 3.42 ± 6.29    | 3.86 ± 8.22   |
| Lachnospiraceae                     | 19.82 ± 7.29   | 21.98 ± 8.99  |
| Coriobacteriaceae                   | 6.14 ± 4.13    | 10.31 ± 9.05  |
| Enterobacteriaceae                  | 2.98 ± 5.09    | 1.08 ± 2.78   |
| Bacteroidaceae                      | 4.95 ± 6.83    | 4.32 ± 4.45   |
| Ruminococcaceae                     | 12.43 ± 4.27   | 11.95 ± 5.40  |
| Veillonellaceae                     | 1.30 ± 1.63    | 2.39 ± 4.83   |
| Akkermansiaceae                     | 0.59 ± 1.04    | 1.41 ± 3.50   |
| Streptococcaceae                    | 1.63 ± 3.31    | 0.87 ± 1.30   |
| Methanobacteriaceae                 | 1.75 ± 2.67    | 1.57 ± 2.73   |
| Eggerthellaceae                     | 3.25 ± 1.95    | 4.04 ± 2.13   |
| Erysipelatoclostridiaceae           | 1.17 ± 1.14    | 1.40 ± 1.66   |
| Erysipelotrichaceae                 | 1.63 ± 1.97    | 1.50 ± 2.18   |
| Clostridiaceae                      | 0.78 ± 0.48    | 1.01 ± 0.86   |
| Oscillospiraceae                    | 2.64 ± 1.51    | 2.22 ± 1.60   |
| Christensenellaceae                 | 1.61 ± 1.07    | 1.23 ± 1.21   |
| Eubacterium_coprostanoligenes_group | 1.21 ± 0.58    | 1.22 ± 0.69   |
| Others                              | 13.59 ± 11.16  | 11.40 ± 9.56  |
| SCFAs (mM)                          |                |               |
| Acetic acid                         | 45.97 ± 20.25  | 50.00 ± 28.23 |
| Butyric acid                        | 13.13 ± 8.72   | 11.75 ± 7.64  |
| Propionic acid                      | 13.23 ± 6.98   | 16.12 ± 8.94  |
| Isobutyric acid                     | 0.92 ± 1.04    | 0.92 ± 1.07   |
| Isovaleric acid                     | 2.01 ± 1.71    | 2.00 ± 1.52   |
| Valeric acid                        | 2.13 ± 1.56    | 1.55 ± 1.08   |
| Caproic acid                        | 0.85 ± 1.02    | 0.27 ± 0.55   |
| Amino acids (mM)                    |                |               |
| Total amino acids                   | 48.55 ± 24.78  | 49.13 ± 22.44 |
| Protein amino acids                 | 47.46 ± 23.82  | 47.86 ± 21.43 |
| Biogenic amines                     | 0.94 ± 1.40    | 1.12 ± 2.03   |
| Ammonium                            | 28.51 ± 17.22  | 29.36 ± 17.36 |

Values are presented as mean ± standard deviation. SCFAs, short chain fatty acids.

**Table S2.** Microbial abundance and faecal SCFAs, amino acids, biogenic amines and ammonium concentrations according to milk consumption (g/day) category in each diagnosis group.

|                                     | Control            |                    | Polyps             |                    |
|-------------------------------------|--------------------|--------------------|--------------------|--------------------|
|                                     | Milk<120<br>(n=11) | Milk≥120<br>(n=14) | Milk<120<br>(n=12) | Milk≥120<br>(n=23) |
| Microbial families (% Abundance)    |                    |                    |                    |                    |
| Bifidobacteriaceae                  | 9.03 ± 11.98       | 16.21 ± 13.75      | 12.52 ± 14.58      | 10.40 ± 10.42      |
| Peptostreptococcaceae               | 2.48 ± 2.16        | 8.85 ± 9.86 *      | 6.26 ± 7.66        | 4.53 ± 3.62        |
| Prevotellaceae                      | 2.71 ± 4.67        | 3.98 ± 7.45        | 3.82 ± 6.71        | 3.88 ± 9.05        |
| Lachnospiraceae                     | 21.51 ± 4.96       | 18.5 ± 8.65        | 18.33 ± 5.74       | 23.88 ± 9.86       |
| Coriobacteriaceae                   | 5.02 ± 5.06        | 7.02 ± 3.14 *      | 9.79 ± 10.21       | 10.59 ± 8.61       |
| Enterobacteriaceae                  | 3.85 ± 5.45        | 2.30 ± 4.88        | 2.14 ± 4.63        | 0.52 ± 0.56        |
| Bacteroidaceae                      | 8.46 ± 9.17        | 2.19 ± 1.69 *      | 2.84 ± 1.74        | 5.09 ± 5.22        |
| Ruminococcaceae                     | 12.18 ± 3.08       | 12.63 ± 5.12       | 11.73 ± 3.69       | 12.06 ± 6.19       |
| Veillonellaceae                     | 1.39 ± 2.15        | 1.23 ± 1.17        | 2.81 ± 5.46        | 2.17 ± 4.59        |
| Akkermansiaceae                     | 0.61 ± 1.13        | 0.58 ± 1.02        | 0.30 ± 0.58        | 1.98 ± 4.21 *      |
| Streptococcaceae                    | 2.07 ± 4.70        | 1.29 ± 1.73        | 0.75 ± 0.68        | 0.94 ± 1.54        |
| Methanobacteriaceae                 | 1.70 ± 3.15        | 1.8 ± 2.35         | 2.76 ± 3.72        | 0.94 ± 1.84        |
| Eggerthellaceae                     | 3.34 ± 2.45        | 3.18 ± 1.56        | 4.44 ± 2.26        | 3.83 ± 2.09        |
| Erysipelatoclostridiaceae           | 0.94 ± 1.19        | 1.35 ± 1.11        | 1.24 ± 2.26        | 1.48 ± 1.30        |
| Erysipelotrichaceae                 | 1.35 ± 2.18        | 1.85 ± 1.84 *      | 2.20 ± 2.60        | 1.14 ± 1.89        |
| Clostridiaceae                      | 0.65 ± 0.41        | 0.89 ± 0.52        | 0.94 ± 0.80        | 1.05 ± 0.90        |
| Oscillospiraceae                    | 2.34 ± 1.04        | 2.87 ± 1.80        | 2.29 ± 1.45        | 2.19 ± 1.70        |
| Christensenellaceae                 | 1.77 ± 1.32        | 1.48 ± 0.86        | 1.25 ± 0.73        | 1.22 ± 1.41        |
| Eubacterium_coprostanoligenes_group | 1.10 ± 0.53        | 1.30 ± 0.62        | 1.48 ± 0.59        | 1.08 ± 0.72        |
| Others                              | 17.50 ± 12.50      | 10.51 ± 9.31       | 12.12 ± 9.28       | 11.03 ± 9.89       |
| SCFAs (mM)                          |                    |                    |                    |                    |
| Acetic acid                         | 50.77 ± 21.68      | 42.20 ± 18.98      | 44.33 ± 24.44      | 52.95 ± 30.10      |
| Butyric acid                        | 14.44 ± 9.79       | 12.10 ± 8.02       | 11.44 ± 6.65       | 11.91 ± 8.25       |
| Propionic acid                      | 12.64 ± 5.4        | 13.69 ± 8.18       | 13.89 ± 8.84       | 17.29 ± 8.95       |
| Isobutyric acid                     | 0.61 ± 0.70        | 1.16 ± 1.22        | 1.08 ± 1.26        | 0.85 ± 0.97        |
| Isovaleric acid                     | 1.48 ± 1.14        | 2.43 ± 1.99        | 2.14 ± 1.32        | 1.92 ± 1.64        |
| Valeric acid                        | 1.79 ± 1.02        | 2.39 ± 1.88        | 1.74 ± 1.3         | 1.44 ± 0.96        |
| Caproic acid                        | 1.08 ± 1.28        | 0.67 ± 0.77        | 0.62 ± 0.83        | 0.09 ± 0.15        |
| Amino acids (mM)                    |                    |                    |                    |                    |
| Total amino acids                   | 42.14 ± 19.91      | 53.58 ± 27.70      | 48.31 ± 16.52      | 49.56 ± 25.33      |
| Protein amino acids                 | 41.10 ± 19.50      | 52.46 ± 26.34      | 47.46 ± 15.66      | 48.06 ± 24.24      |
| Biogenic amines                     | 0.91 ± 1.39        | 0.97 ± 1.47        | 0.67 ± 1.34        | 1.35 ± 2.31        |
| Ammonium                            | 26.32 ± 15.23      | 30.23 ± 19.02      | 29.3 ± 13.25       | 29.39 ± 19.44      |

Values are presented as mean ± standard deviation. (\*) Differential microbial family abundance according to linear effect size discriminant analysis (LEfSe) at a threshold of 2.0 for the comparison of samples from each category of consumption in diagnosis groups. No significant differences were found by U Mann-Whitney analysis ( $p < 0.05$ ) of metabolites between the two consumption levels. SCFAs, short chain fatty acids.

**Table S3.** Microbial abundance and faecal SCFAs, amino acids, biogenic amines and ammonium concentrations according to red meat consumption (g/day) category in each diagnosis group.

|                                     | Control          |                  | Polyps           |                  |
|-------------------------------------|------------------|------------------|------------------|------------------|
|                                     | R.M<50<br>(n=14) | R.M≥50<br>(n=11) | R.M<50<br>(n=18) | R.M≥50<br>(n=17) |
| Microbial families (% Abundance)    |                  |                  |                  |                  |
| Bifidobacteriaceae                  | 12.37 ± 12.26    | 13.92 ± 14.98    | 10.37 ± 10.25    | 11.93 ± 13.59    |
| Peptostreptococcaceae               | 5.45 ± 8.60      | 6.80 ± 7.66      | 4.76 ± 4.07      | 5.51 ± 6.47      |
| Prevotellaceae                      | 2.43 ± 4.17      | 4.68 ± 8.32      | 5.4 ± 10.52      | 2.22 ± 4.53      |
| Lachnospiraceae                     | 19.10 ± 5.03     | 20.74 ± 9.64     | 23.46 ± 9.24     | 20.42 ± 8.70     |
| Coriobacteriaceae                   | 4.15 ± 2.56      | 8.67 ± 4.46 *    | 9.02 ± 8.18      | 11.69 ± 9.95     |
| Enterobacteriaceae                  | 2.66 ± 4.89      | 3.40 ± 5.54      | 0.58 ± 0.49      | 1.60 ± 3.95      |
| Bacteroidaceae                      | 7.17 ± 8.45      | 2.12 ± 1.88 *    | 5.22 ± 5.21      | 3.36 ± 3.36      |
| Ruminococcaceae                     | 12.22 ± 3.63     | 12.71 ± 5.14     | 12.80 ± 4.74     | 11.04 ± 6.04     |
| Veillonellaceae                     | 1.10 ± 1.26      | 1.56 ± 2.05      | 2.25 ± 4.17      | 2.54 ± 5.58      |
| Akkermansiaceae                     | 0.82 ± 1.18      | 0.31 ± 0.80 *    | 1.40 ± 2.56      | 1.41 ± 4.36      |
| Streptococcaceae                    | 2.36 ± 4.3       | 0.72 ± 0.82      | 0.83 ± 1.49      | 0.92 ± 1.12      |
| Methanobacteriaceae                 | 1.65 ± 2.95      | 1.89 ± 2.42      | 0.88 ± 2.19      | 2.29 ± 3.10      |
| Eggerthellaceae                     | 3.31 ± 2.37      | 3.18 ± 1.37      | 4.04 ± 1.77      | 4.04 ± 2.52      |
| Erysipelatoclostridiaceae           | 0.87 ± 0.92      | 1.55 ± 1.31      | 0.96 ± 0.69      | 1.87 ± 2.22      |
| Erysipelotrichaceae                 | 1.43 ± 2.04      | 1.89 ± 1.93      | 1.26 ± 1.69      | 1.77 ± 2.64      |
| Clostridiaceae                      | 0.75 ± 0.48      | 0.83 ± 0.51      | 1.01 ± 1.01      | 1.01 ± 0.69      |
| Oscillospiraceae                    | 2.85 ± 1.50      | 2.37 ± 1.55      | 2.38 ± 1.50      | 2.06 ± 1.73      |
| Christensenellaceae                 | 1.62 ± 0.97      | 1.60 ± 1.24      | 1.18 ± 0.94      | 1.29 ± 1.47      |
| Eubacterium_coprostanoligenes_group | 1.11 ± 0.68      | 1.34 ± 0.40      | 1.29 ± 0.54      | 1.13 ± 0.84      |
| Others                              | 16.50 ± 11.89    | 9.75 ± 9.30      | 10.92 ± 7.14     | 11.91 ± 11.81    |
| SCFAs (mM)                          |                  |                  |                  |                  |
| Acetic acid                         | 44.44 ± 20.51    | 47.91 ± 20.72    | 44.66 ± 21.14    | 55.65 ± 33.95    |
| Butyric acid                        | 12.00 ± 9.30     | 14.56 ± 8.13     | 10.44 ± 4.83     | 13.13 ± 9.76     |
| Propionic acid                      | 11.52 ± 5.46     | 15.40 ± 8.29     | 13.89 ± 6.98     | 18.49 ± 10.31    |
| Isobutyric acid                     | 0.66 ± 0.63      | 1.24 ± 1.38      | 0.91 ± 0.90      | 0.94 ± 1.24      |
| Isovaleric acid                     | 1.60 ± 0.97      | 2.54 ± 2.28      | 2.06 ± 1.47      | 1.93 ± 1.62      |
| Valeric acid                        | 1.48 ± 0.58      | 2.95 ± 2.02 †    | 1.61 ± 0.92      | 1.48 ± 1.25      |
| Caproic acid                        | 0.62 ± 0.86      | 1.14 ± 1.18      | 0.25 ± 0.59      | 0.29 ± 0.52      |
| Amino acids (mM)                    |                  |                  |                  |                  |
| Total amino acids                   | 43.00 ± 20.40    | 55.60 ± 28.90    | 44.18 ± 21.34    | 54.37 ± 23.02    |
| Protein amino acids                 | 42.21 ± 20.08    | 54.13 ± 27.39    | 43.64 ± 20.75    | 52.32 ± 21.86    |
| Biogenic amines                     | 0.65 ± 1.05      | 1.32 ± 1.74      | 0.40 ± 0.77      | 1.88 ± 2.64      |
| Ammonium                            | 24.74 ± 11.90    | 33.31 ± 21.96    | 28.37 ± 17.11    | 30.41 ± 18.08    |

Values are presented as mean ± standard deviation. (\*) Differential microbial family abundance according to linear effect size discriminant analysis (LEfSe) at a threshold of 2.0 for the comparison of samples from each category of consumption in diagnosis groups. (†) U Mann-Whitney statistically significant difference (p < 0.05) in metabolite between the two levels of consumption in the diagnosis group. R.M, red meat; SCFAs, short chain fatty acids.

**Table S4.** Microbial abundance and faecal SCFAs, amino acids, biogenic amines and ammonium concentrations according to processed meat consumption (g/day) category in each diagnosis group.

|                                     | Control         |                  | Polyps          |                  |
|-------------------------------------|-----------------|------------------|-----------------|------------------|
|                                     | P.M<25<br>(n=4) | P.M≥25<br>(n=21) | P.M<25<br>(n=7) | P.M≥25<br>(n=28) |
| Microbial families (% Abundance)    |                 |                  |                 |                  |
| Bifidobacteriaceae                  | 24.94 ± 12.35   | 10.79 ± 12.41 *  | 15.83 ± 13.65   | 9.95 ± 11.31     |
| Peptostreptococcaceae               | 9.97 ± 11.73    | 5.30 ± 7.33      | 4.15 ± 3.22     | 5.37 ± 5.73      |
| Prevotellaceae                      | 3.09 ± 2.30     | 3.48 ± 6.83 *    | 4.87 ± 6.52     | 3.60 ± 8.68      |
| Lachnospiraceae                     | 15.11 ± 5.77    | 20.72 ± 7.31     | 20.14 ± 10.08   | 22.44 ± 8.83     |
| Coriobacteriaceae                   | 4.81 ± 1.67     | 6.39 ± 4.43      | 9.79 ± 7.36     | 10.44 ± 9.54     |
| Enterobacteriaceae                  | 2.62 ± 4.75     | 3.06 ± 5.26      | 0.43 ± 0.50     | 1.24 ± 3.09      |
| Bacteroidaceae                      | 2.91 ± 1.01     | 5.34 ± 7.41      | 2.57 ± 1.83     | 4.76 ± 4.81      |
| Ruminococcaceae                     | 9.99 ± 3.07     | 12.90 ± 4.36     | 10.23 ± 3.46    | 12.38 ± 5.76     |
| Veillonellaceae                     | 1.63 ± 1.36     | 1.24 ± 1.70      | 3.98 ± 8.17     | 1.99 ± 3.71      |
| Akkermansiaceae                     | 0.62 ± 1.00     | 0.59 ± 1.07      | 0.78 ± 1.32     | 1.56 ± 3.86      |
| Streptococcaceae                    | 5.12 ± 7.22     | 0.97 ± 1.57      | 0.58 ± 0.42     | 0.95 ± 1.44      |
| Methanobacteriaceae                 | 0.53 ± 0.46     | 1.99 ± 2.86      | 1.11 ± 2.32     | 1.68 ± 2.84      |
| Eggerthellaceae                     | 2.77 ± 0.77     | 3.34 ± 2.11      | 4.78 ± 2.65     | 3.85 ± 2.00      |
| Erysipelatoclostridiaceae           | 0.46 ± 0.20     | 1.30 ± 1.20 *    | 0.52 ± 0.39     | 1.62 ± 1.79 *    |
| Erysipelotrichaceae                 | 0.91 ± 0.83     | 1.77 ± 2.10      | 1.65 ± 1.93     | 1.47 ± 2.27      |
| Clostridiaceae                      | 0.75 ± 0.41     | 0.79 ± 0.50      | 0.90 ± 0.80     | 1.04 ± 0.88      |
| Oscillospiraceae                    | 2.46 ± 0.50     | 2.68 ± 1.64      | 2.83 ± 1.62     | 2.07 ± 1.59      |
| Christensenellaceae                 | 1.54 ± 0.29     | 1.62 ± 1.17      | 1.86 ± 1.70     | 1.07 ± 1.03      |
| Eubacterium_coprostanoligenes_group | 1.05 ± 0.26     | 1.24 ± 0.62      | 0.94 ± 0.36     | 1.29 ± 0.74      |
| Others                              | 8.75 ± 4.64     | 14.51 ± 11.86    | 12.08 ± 7.76    | 11.23 ± 10.08    |
| SCFAs (mM)                          |                 |                  |                 |                  |
| Acetic acid                         | 40.38 ± 30.09   | 47.03 ± 18.67    | 45.19 ± 17.95   | 51.20 ± 30.4     |
| Butyric acid                        | 13.92 ± 13.92   | 12.98 ± 7.88     | 11.65 ± 5.37    | 11.77 ± 8.19     |
| Propionic acid                      | 10.77 ± 8.13    | 13.70 ± 6.86     | 15.25 ± 7.90    | 16.34 ± 9.30     |
| Isobutyric acid                     | 0.43 ± 0.19     | 1.01 ± 1.12      | 1.34 ± 1.04     | 0.82 ± 1.06      |
| Isovaleric acid                     | 1.30 ± 0.40     | 2.15 ± 1.83      | 2.77 ± 1.74     | 1.80 ± 1.43      |
| Valeric acid                        | 1.59 ± 0.73     | 2.23 ± 1.67      | 1.87 ± 0.80     | 1.47 ± 1.14      |
| Caproic acid                        | 0.87 ± 0.89     | 0.84 ± 1.07      | 0.13 ± 0.17     | 0.30 ± 0.61      |
| Amino acids (mM)                    |                 |                  |                 |                  |
| Total amino acids                   | 46.90 ± 10.80   | 48.86 ± 26.81    | 60.01 ± 30.34   | 46.41 ± 19.78    |
| Protein amino acids                 | 45.70 ± 9.64    | 47.79 ± 25.81    | 59.36 ± 29.56   | 44.98 ± 18.48    |
| Biogenic amines                     | 0.98 ± 1.64     | 0.94 ± 1.40      | 0.49 ± 0.80     | 1.28 ± 2.22      |
| Ammonium                            | 25.34 ± 10.42   | 29.11 ± 18.36    | 41.14 ± 26.43   | 26.42 ± 13.38    |

Values are presented as mean ± standard deviation. (\*) Differential microbial family abundance according to linear effect size discriminant analysis (LEfSe) at a threshold of 2.0 for the comparison of samples from each category of consumption in diagnosis groups. No significant differences were found by U Mann-Whitney analysis ( $p < 0.05$ ) of metabolites between the two consumption levels. P.M, processed meat; SCFAs, short chain fatty acids.

**Table S5.** Microbial abundance and faecal SCFAs, amino acids, biogenic amines and ammonium concentrations according to fibre consumption (g/day) category in each diagnosis group.

|                                     | Control           |                          | Polyps             |                    |
|-------------------------------------|-------------------|--------------------------|--------------------|--------------------|
|                                     | Fibre<20<br>(n=9) | Fibre≥20<br>(n=16)       | Fibre<20<br>(n=20) | Fibre≥20<br>(n=15) |
| Microbial families (% Abundance)    |                   |                          |                    |                    |
| Bifidobacteriaceae                  | 12.41 ± 15.75     | 13.41 ± 12.17            | 11.12 ± 11.22      | 11.13 ± 13.01      |
| Peptostreptococcaceae               | 3.16 ± 2.12       | 7.67 ± 9.69              | 4.83 ± 4.09        | 5.52 ± 6.73        |
| Prevotellaceae                      | 3.24 ± 4.88       | 3.52 ± 7.11              | 1.84 ± 4.03        | 6.54 ± 11.34       |
| Lachnospiraceae                     | 20.93 ± 5.58      | 19.20 ± 8.20             | 24.32 ± 9.78       | 18.86 ± 6.93       |
| Coriobacteriaceae                   | 4.23 ± 2.16       | 7.21 ± 4.63 *            | 11.72 ± 8.62       | 8.43 ± 9.55        |
| Enterobacteriaceae                  | 3.76 ± 5.85       | 2.55 ± 4.75              | 0.58 ± 0.65        | 1.74 ± 4.17        |
| Bacteroidaceae                      | 8.15 ± 9.86       | 3.15 ± 3.64              | 3.73 ± 3.96        | 5.10 ± 5.05        |
| Ruminococcaceae                     | 12.93 ± 4.79      | 12.15 ± 4.08             | 11.4 ± 4.25        | 12.67 ± 6.75       |
| Veillonellaceae                     | 0.78 ± 0.71       | 1.59 ± 1.94              | 1.84 ± 3.95        | 3.12 ± 5.88        |
| Akkermansiaceae                     | 0.80 ± 1.32       | 0.48 ± 0.88              | 1.25 ± 2.45        | 1.61 ± 4.63        |
| Streptococcaceae                    | 2.62 ± 5.10       | 1.08 ± 1.66              | 0.82 ± 1.03        | 0.95 ± 1.64        |
| Methanobacteriaceae                 | 1.87 ± 3.08       | 1.69 ± 2.52              | 1.74 ± 3.14        | 1.34 ± 2.14        |
| Eggerthellaceae                     | 3.13 ± 2.60       | 3.32 ± 1.58              | 4.35 ± 1.93        | 3.62 ± 2.38        |
| Erysipelatoclostridiaceae           | 0.86 ± 0.88       | 1.34 ± 1.26              | 1.61 ± 2.05        | 1.12 ± 0.93        |
| Erysipelotrichaceae                 | 1.82 ± 2.33       | 1.52 ± 1.80              | 1.03 ± 1.46        | 2.14 ± 2.81        |
| Clostridiaceae                      | 0.70 ± 0.34       | 0.83 ± 0.55              | 1.18 ± 0.99        | 0.79 ± 0.60        |
| Oscillospiraceae                    | 2.58 ± 1.40       | 2.68 ± 1.62              | 2.38 ± 1.94        | 2.01 ± 1.01        |
| Christensenellaceae                 | 1.96 ± 1.38       | 1.41 ± 0.84              | 1.34 ± 1.32        | 1.08 ± 1.07        |
| Eubacterium_coprostanoligenes_group | 1.03 ± 0.43       | 1.32 ± 0.64              | 1.14 ± 0.66        | 1.32 ± 0.74        |
| Others                              | 13.04 ± 12.13     | 13.90 ± 10.99            | 11.77 ± 7.49       | 10.92 ± 12.06      |
| SCFAs (mM)                          |                   |                          |                    |                    |
| Acetic acid                         | 51.37 ± 25.88     | 42.93 ± 16.47            | 46.87 ± 27.55      | 54.17 ± 29.54      |
| Butyric acid                        | 14.45 ± 11.19     | 12.39 ± 7.31             | 10.39 ± 6.73       | 13.56 ± 8.62       |
| Propionic acid                      | 14.23 ± 9.15      | 12.67 ± 5.69             | 15.30 ± 9.55       | 17.22 ± 8.24       |
| Isobutyric acid                     | 0.35 ± 0.28       | 1.23 ± 1.19 <sup>+</sup> | 0.65 ± 0.68        | 1.29 ± 1.37        |
| Isovaleric acid                     | 1.12 ± 0.59       | 2.51 ± 1.93 <sup>+</sup> | 1.67 ± 1.09        | 2.43 ± 1.91        |
| Valeric acid                        | 1.68 ± 0.86       | 2.37 ± 1.83              | 1.41 ± 1.13        | 1.73 ± 1.02        |
| Caproic acid                        | 1.11 ± 1.00       | 0.70 ± 1.04              | 0.28 ± 0.65        | 0.26 ± 0.41        |
| Amino acids (mM)                    |                   |                          |                    |                    |
| Total amino acids                   | 38.51 ± 19.94     | 54.19 ± 26               | 46.43 ± 22.34      | 52.73 ± 22.83      |
| Protein amino acids                 | 37.50 ± 19.46     | 53.05 ± 24.75            | 44.93 ± 20.96      | 51.76 ± 22.17      |
| Biogenic amines                     | 0.84 ± 1.21       | 1.00 ± 1.54              | 1.35 ± 2.52        | 0.81 ± 1.12        |
| Ammonium                            | 19.83 ± 10.19     | 33.39 ± 18.66            | 28.40 ± 17.63      | 30.64 ± 17.51      |

Values are presented as mean ± standard deviation. (\*) Differential microbial family abundance according to linear effect size discriminant analysis (LEfSe) at a threshold of 2.0 for the comparison of samples from each category of consumption in diagnosis groups. (<sup>+</sup>) U Mann-Whitney statistically significant difference (p < 0.05) in metabolite between the two levels of consumption in the diagnosis groups. SCFAs, short chain fatty acids.

**Table S6.** Microbial abundance and faecal SCFAs, amino acids, biogenic amines and ammonium concentrations according to soluble pectin intake (g/day) category in each diagnosis group.

|                                     | Control            |                     | Polyps              |                     |
|-------------------------------------|--------------------|---------------------|---------------------|---------------------|
|                                     | S.P.<0.57<br>(n=9) | S.P.≥0.57<br>(n=16) | S.P.<0.57<br>(n=17) | S.P.≥0.57<br>(n=18) |
| Microbial families (% Abundance)    |                    |                     |                     |                     |
| Bifidobacteriaceae                  | 10.37 ± 7.17       | 14.56 ± 15.7        | 10.08 ± 10.20       | 12.12 ± 13.42       |
| Peptostreptococcaceae               | 4.70 ± 4.41        | 6.80 ± 9.59         | 5.98 ± 6.81         | 4.32 ± 3.34         |
| Prevotellaceae                      | 4.17 ± 8.47        | 3.00 ± 4.95         | 2.10 ± 4.54         | 5.52 ± 10.48        |
| Lachnospiraceae                     | 20.04 ± 8.15       | 19.7 ± 7.04         | 25.02 ± 9.17        | 19.11 ± 8.02        |
| Coriobacteriaceae                   | 6.23 ± 4.41        | 6.08 ± 4.11         | 11.04 ± 7.44        | 9.63 ± 10.51        |
| Enterobacteriaceae                  | 3.76 ± 5.91        | 2.55 ± 4.72         | 1.49 ± 3.88         | 0.69 ± 1.00         |
| Bacteroidaceae                      | 6.93 ± 10.12       | 3.84 ± 4.06         | 4.09 ± 3.57         | 4.54 ± 5.24         |
| Ruminococcaceae                     | 11.54 ± 4.02       | 12.94 ± 4.44        | 11.10 ± 4.49        | 12.74 ± 6.17        |
| Veillonellaceae                     | 1.20 ± 1.23        | 1.36 ± 1.86         | 0.90 ± 1.10         | 3.80 ± 6.42         |
| Akkermansiaceae                     | 0.50 ± 1.12        | 0.65 ± 1.03         | 1.77 ± 4.35         | 1.06 ± 2.53         |
| Streptococcaceae                    | 2.31 ± 5.06        | 1.26 ± 1.86         | 0.75 ± 1.55         | 0.99 ± 1.05         |
| Methanobacteriaceae                 | 1.30 ± 1.49        | 2.01 ± 3.17         | 1.19 ± 2.03         | 1.93 ± 3.27         |
| Eggerthellaceae                     | 3.41 ± 1.79        | 3.16 ± 2.09         | 4.33 ± 2.21         | 3.76 ± 2.08         |
| Erysipelatoclostridiaceae           | 0.98 ± 0.82        | 1.27 ± 1.30         | 1.50 ± 2.00         | 1.31 ± 1.32         |
| Erysipelotrichaceae                 | 2.17 ± 2.62        | 1.33 ± 1.50         | 1.91 ± 2.70         | 1.13 ± 1.53         |
| Clostridiaceae                      | 0.66 ± 0.38        | 0.85 ± 0.53         | 1.12 ± 1.03         | 0.90 ± 0.67         |
| Oscillospiraceae                    | 2.85 ± 1.65        | 2.52 ± 1.47         | 1.86 ± 1.38         | 2.57 ± 1.75         |
| Christensenellaceae                 | 1.70 ± 0.99        | 1.55 ± 1.15         | 1.03 ± 1.15         | 1.42 ± 1.26         |
| Eubacterium_coprostanoligenes_group | 1.03 ± 0.47        | 1.31 ± 0.62         | 1.18 ± 0.70         | 1.25 ± 0.70         |
| Others                              | 14.15 ± 11.91      | 13.27 ± 11.11       | 11.58 ± 9.33        | 11.23 ± 10.04       |
| SCFAs (mM)                          |                    |                     |                     |                     |
| Acetic acid                         | 53.17 ± 21.53      | 41.92 ± 18.97       | 54.18 ± 25.66       | 46.05 ± 30.66       |
| Butyric acid                        | 14.16 ± 11.44      | 12.55 ± 7.14        | 12.50 ± 7.45        | 11.04 ± 7.96        |
| Propionic acid                      | 13.39 ± 5.86       | 13.14 ± 7.72        | 17.37 ± 7.42        | 14.95 ± 10.24       |
| Isobutyric acid                     | 0.96 ± 1.47        | 0.89 ± 0.77         | 1.08 ± 1.32         | 0.78 ± 0.76         |
| Isovaleric acid                     | 2.13 ± 2.46        | 1.94 ± 1.19         | 2.12 ± 1.75         | 1.87 ± 1.31         |
| Valeric acid                        | 2.48 ± 2.28        | 1.93 ± 1.01         | 1.85 ± 1.26         | 1.26 ± 0.82         |
| Caproic acid                        | 10 ± 1.06          | 0.76 ± 1.03         | 0.40 ± 0.72         | 0.14 ± 0.28         |
| Amino acids (mM)                    |                    |                     |                     |                     |
| Total amino acids                   | 42.88 ± 24.88      | 51.73 ± 24.95       | 49.89 ± 25.29       | 48.42 ± 20.10       |
| Protein amino acids                 | 41.39 ± 23.48      | 50.87 ± 24.06       | 48.76 ± 24.22       | 47.00 ± 19.12       |
| Biogenic amines                     | 1.35 ± 1.73        | 0.71 ± 1.18         | 0.96 ± 1.34         | 1.27 ± 2.56         |
| Ammonium                            | 27.19 ± 15.39      | 29.25 ± 18.61       | 29.89 ± 18.07       | 28.86 ± 17.17       |

Values are presented as mean ± standard deviation. (\*) Differential microbial family abundance according to linear effect size discriminant analysis (LEfSe) at a threshold of 2.0 for the comparison of samples from each category of consumption in diagnosis groups. No significant differences were found by U Mann-Whitney analysis ( $p < 0.05$ ) of metabolites between the two consumption levels. S.P , soluble pectin; SCFAs, short chain fatty acids.

**Table S7.** Microbial abundance and faecal SCFAs, amino acids, biogenic amines and ammonium concentrations according to total polyphenols intake (mg/day) category in each diagnosis group.

|                                     | Control           |                    | Polyps            |                    |
|-------------------------------------|-------------------|--------------------|-------------------|--------------------|
|                                     | T.P.<650<br>(n=2) | T.P.≥650<br>(n=23) | T.P.<650<br>(n=4) | T.P.≥650<br>(n=31) |
| Microbial families (% Abundance)    |                   |                    |                   |                    |
| Bifidobacteriaceae                  | 12.33 ± 12.69     | 18.32 ± 19.19      | 11.64 ± 12        | 2.71 ± 0.24        |
| Peptostreptococcaceae               | 6.46 ± 8.49       | 3.02 ± 2.68 *      | 4.89 ± 5.34       | 9 ± 3.52           |
| Prevotellaceae                      | 3.71 ± 6.66       | 1.30 ± 0.99 *      | 4.07 ± 8.43       | 0.41 ± 0.11        |
| Lachnospiraceae                     | 19.65 ± 7.34      | 21.11 ± 8.3        | 21.39 ± 8.91      | 31.73 ± 0.7        |
| Coriobacteriaceae                   | 5.76 ± 3.49       | 8.86 ± 8.02 *      | 10.8 ± 9.10       | 2.32 ± 0.25        |
| Enterobacteriaceae                  | 3.05 ± 5.29       | 2.49 ± 4.08        | 1.11 ± 2.86       | 0.62 ± 0.02        |
| Bacteroidaceae                      | 5.21 ± 7.26       | 3.03 ± 0.67 *      | 4.17 ± 4.48       | 6.79 ± 4.25        |
| Ruminococcaceae                     | 12.28 ± 4.30      | 13.56 ± 4.68       | 11.2 ± 4.55       | 24.29 ± 2.87       |
| Veillonellaceae                     | 1.24 ± 1.65       | 1.74 ± 1.78 *      | 2.52 ± 4.95       | 0.23 ± 0.03        |
| Akkermansiaceae                     | 0.56 ± 1.06       | 0.86 ± 1.09        | 1.47 ± 3.59       | 0.27 ± 0.30        |
| Streptococcaceae                    | 1.82 ± 3.50       | 0.27 ± 0.25        | 0.87 ± 1.34       | 0.91 ± 0.11        |
| Methanobacteriaceae                 | 1.94 ± 2.80       | 0.41 ± 0.42        | 1.64 ± 2.79       | 0.43 ± 0.15        |
| Eggerthellaceae                     | 3.23 ± 2.00       | 3.41 ± 1.98        | 3.98 ± 2.18       | 4.97 ± 0.83        |
| Erysipelatoclostridiaceae           | 1.27 ± 1.18       | 0.44 ± 0.09        | 1.39 ± 1.71       | 1.64 ± 0.84        |
| Erysipelotrichaceae                 | 1.56 ± 1.78       | 2.17 ± 3.57 *      | 1.41 ± 2.13       | 2.99 ± 3.54        |
| Clostridiaceae                      | 0.83 ± 0.48       | 0.46 ± 0.37        | 0.99 ± 0.86       | 1.28 ± 0.89        |
| Oscillospiraceae                    | 2.63 ± 1.59       | 2.73 ± 0.85        | 2.23 ± 1.65       | 2.03 ± 0.47        |
| Christensenellaceae                 | 1.64 ± 1.10       | 1.4 ± 0.98         | 1.22 ± 1.24       | 1.4 ± 0.34         |
| Eubacterium_coprostanoligenes_group | 1.15 ± 0.57       | 1.69 ± 0.41        | 1.2 ± 0.70        | 1.49 ± 0.63        |
| Others                              | 31.23 ± 0.53      | 12.05 ± 10.26      | 9.04 ± 9.10       | 11.71 ± 9.72       |
| SCFAs (mM)                          |                   |                    |                   |                    |
| Acetic acid                         | 44.99 ± 19.46     | 53.15 ± 29.21      | 49.79 ± 28.94     | 53.32 ± 16.16      |
| Butyric acid                        | 12.61 ± 8.52      | 16.91 ± 11.27      | 11.63 ± 7.83      | 13.71 ± 3.63       |
| Propionic acid                      | 13.55 ± 7.19      | 10.88 ± 5.66       | 16.23 ± 9.2       | 14.32 ± 0.95       |
| Isobutyric acid                     | 0.91 ± 1.06       | 0.98 ± 1.17        | 0.96 ± 1.08       | 0.28 ± 0.39        |
| Isovaleric acid                     | 2.00 ± 1.75       | 2.05 ± 1.69        | 2.06 ± 1.54       | 0.92 ± 0.75        |
| Valeric acid                        | 2.08 ± 1.59       | 2.49 ± 1.64        | 1.56 ± 1.11       | 1.31 ± 0.02        |
| Caproic acid                        | 0.66 ± 0.80       | 2.2 ± 1.67         | 0.28 ± 0.56       | 0.01 ± 0.00        |
| Amino acids (mM)                    |                   |                    |                   |                    |
| Total amino acids                   | 49.21 ± 25.84     | 43.71 ± 17.95      | 49.8 ± 22.85      | 38.16 ± 12.82      |
| Protein amino acids                 | 48.14 ± 24.89     | 42.46 ± 16.13      | 48.48 ± 21.81     | 37.57 ± 13.34      |
| Biogenic amines                     | 0.91 ± 1.38       | 1.21 ± 1.86        | 1.16 ± 2.09       | 0.46 ± 0.48        |
| Ammonium                            | 27.91 ± 17.69     | 32.93 ± 15.49      | 30.28 ± 17.43     | 14.23 ± 5.56       |

Values are presented as mean ± standard deviation. (\*) Differential microbial family abundance according to linear effect size discriminant analysis (LEfSe) at a threshold of 2.0 for the comparison of samples from each category of consumption in diagnosis groups. No significant differences were found by U Mann-Whitney analysis ( $p < 0.05$ ) of metabolites between the two consumption levels. T.P., total polyphenols; SCFAs, short chain fatty acids.

**Table S8.** Microbial abundance and faecal SCFAs, amino acids, biogenic amines and ammonium concentrations according to flavonoids intake (mg/day) category in each diagnosis group.

|                                     | Control       |               | Polyps        |               |
|-------------------------------------|---------------|---------------|---------------|---------------|
|                                     | Flavonoids<82 | Flavonoids≥82 | Flavonoids<82 | Flavonoids≥82 |
|                                     | .18 (n=9)     | .18 (n=16)    | .18 (n=15)    | .18 (n=20)    |
| Microbial families (% Abundance)    |               |               |               |               |
| Bifidobacteriaceae                  | 14.14 ± 16.08 | 12.43 ± 11.9  | 11.57 ± 10.18 | 10.79 ± 13.19 |
| Peptostreptococcaceae               | 4.11 ± 4.54   | 7.13 ± 9.46   | 5.50 ± 6.88   | 4.84 ± 3.91   |
| Prevotellaceae                      | 5.25 ± 9.30   | 2.39 ± 3.75   | 3.34 ± 5.88   | 4.25 ± 9.76   |
| Lachnospiraceae                     | 15.74 ± 3.98  | 22.12 ± 7.80  | 22.21 ± 10.99 | 21.81 ± 7.45  |
| Coriobacteriaceae                   | 5.50 ± 4.35   | 6.49 ± 4.10   | 13.39 ± 9.53  | 8.01 ± 8.16   |
| Enterobacteriaceae                  | 4.14 ± 7.55   | 2.33 ± 3.12   | 1.49 ± 4.15   | 0.77 ± 0.96   |
| Bacteroidaceae                      | 7.04 ± 10.13  | 3.78 ± 3.98   | 4.18 ± 3.85   | 4.43 ± 4.95   |
| Ruminococcaceae                     | 10.35 ± 2.86  | 13.61 ± 4.55  | 10.32 ± 5.12  | 13.16 ± 5.42  |
| Veillonellaceae                     | 1.32 ± 1.51   | 1.29 ± 1.75   | 2.44 ± 5.61   | 2.35 ± 4.31   |
| Akkermansiaceae                     | 0.47 ± 1.13   | 0.66 ± 1.02   | 1.87 ± 4.64   | 1.05 ± 2.39   |
| Streptococcaceae                    | 0.63 ± 0.88   | 2.20 ± 4.03   | 0.39 ± 0.41   | 1.23 ± 1.61   |
| Methanobacteriaceae                 | 1.24 ± 1.53   | 2.05 ± 3.15   | 0.77 ± 1.60   | 2.17 ± 3.25   |
| Eggerthellaceae                     | 3.38 ± 1.94   | 3.18 ± 2.02   | 4.22 ± 2.42   | 3.90 ± 1.95   |
| Erysipelatoclostridiaceae           | 1.24 ± 0.98   | 1.13 ± 1.25   | 1.81 ± 2.17   | 1.09 ± 1.13   |
| Erysipelotrichaceae                 | 2.04 ± 2.36   | 1.40 ± 1.75   | 1.38 ± 2.59   | 1.60 ± 1.88   |
| Clostridiaceae                      | 0.80 ± 0.47   | 0.77 ± 0.50   | 1.04 ± 1.10   | 0.98 ± 0.65   |
| Oscillospiraceae                    | 2.74 ± 1.64   | 2.59 ± 1.49   | 1.82 ± 1.37   | 2.52 ± 1.72   |
| Christensenellaceae                 | 1.37 ± 1.06   | 1.74 ± 1.09   | 0.72 ± 0.48   | 1.61 ± 1.44   |
| Eubacterium_coprostanoligenes_group | 1.04 ± 0.50   | 1.31 ± 0.61   | 1.02 ± 0.76   | 1.36 ± 0.63   |
| Others                              | 17.46 ± 13.43 | 11.41 ± 9.44  | 10.51 ± 9.06  | 12.07 ± 10.10 |
| SCFAs (mM)                          |               |               |               |               |
| Acetic acid                         | 43.17 ± 12.70 | 47.54 ± 23.72 | 51.58 ± 28.04 | 48.80 ± 29.04 |
| Butyric acid                        | 11.19 ± 7.56  | 14.22 ± 9.37  | 12.12 ± 8.02  | 11.47 ± 7.54  |
| Propionic acid                      | 12.37 ± 4.93  | 13.71 ± 8.01  | 17.59 ± 8.21  | 15.03 ± 9.50  |
| Isobutyric acid                     | 1.25 ± 1.48   | 0.73 ± 0.68   | 1.12 ± 1.34   | 0.78 ± 0.81   |
| Isovaleric acid                     | 2.68 ± 2.43   | 1.63 ± 1.04   | 2.21 ± 1.73   | 1.84 ± 1.37   |
| Valeric acid                        | 2.38 ± 2.19   | 1.98 ± 1.14   | 1.74 ± 1.24   | 1.40 ± 0.95   |
| Caproic acid                        | 0.89 ± 0.94   | 0.82 ± 1.10   | 0.30 ± 0.56   | 0.25 ± 0.56   |
| Amino acids (mM)                    |               |               |               |               |
| Total amino acids                   | 56.11 ± 34.96 | 44.29 ± 16.65 | 55.61 ± 26.03 | 44.27 ± 18.55 |
| Protein amino acids                 | 54.62 ± 33.74 | 43.43 ± 15.89 | 54.00 ± 25.21 | 43.25 ± 17.37 |
| Biogenic amines                     | 1.33 ± 1.79   | 0.72 ± 1.14   | 1.41 ± 1.95   | 0.90 ± 2.11   |
| Ammonium                            | 34.31 ± 24.25 | 25.25 ± 11.36 | 34.16 ± 20.09 | 25.76 ± 14.48 |

Values are presented as mean ± standard deviation. (\*) Differential microbial family abundance according to linear effect size discriminant analysis (LEfSe) at a threshold of 2.0 for the comparison of samples from each category of consumption in diagnosis groups. No significant differences were found by U Mann-Whitney analysis (p < 0.05) of metabolites between the two consumption levels. SCFAs, short chain fatty acids.



**Table S9.** Microbial abundance and faecal SCFAs, amino acids, biogenic amines and ammonium concentrations according to other polyphenols intake (mg/day) category in each diagnosis group.

|                                     | Control              |                            | Polyps               |                     |
|-------------------------------------|----------------------|----------------------------|----------------------|---------------------|
|                                     | O.P.<32.15<br>(n=17) | O.P.≥32.15<br>(n=8)        | O.P.<32.15<br>(n=27) | O.P.≥32.15<br>(n=8) |
| Microbial families (% Abundance)    |                      |                            |                      |                     |
| Bifidobacteriaceae                  | 16.28 ± 14.39        | 6.17 ± 7.00 *              | 12.34 ± 12.31        | 7.04 ± 9.64         |
| Peptostreptococcaceae               | 6.54 ± 9.35          | 4.98 ± 4.62                | 4.72 ± 5.36          | 6.49 ± 5.22         |
| Prevotellaceae                      | 1.07 ± 0.89          | 8.41 ± 9.60                | 2.50 ± 4.83          | 8.45 ± 14.5         |
| Lachnospiraceae                     | 18.87 ± 7.36         | 21.85 ± 7.16               | 21.45 ± 8.83         | 23.76 ± 9.91        |
| Coriobacteriaceae                   | 6.36 ± 4.18          | 5.66 ± 4.27                | 10.63 ± 8.77         | 9.23 ± 10.49        |
| Enterobacteriaceae                  | 3.12 ± 5.76          | 2.70 ± 3.59                | 1.26 ± 3.15          | 0.46 ± 0.49         |
| Bacteroidaceae                      | 5.46 ± 7.60          | 3.87 ± 5.09                | 4.34 ± 4.78          | 4.27 ± 3.37         |
| Ruminococcaceae                     | 11.26 ± 3.27         | 14.92 ± 5.25               | 11.12 ± 4.98         | 14.72 ± 6.21        |
| Veillonellaceae                     | 1.43 ± 1.94          | 1.03 ± 0.65                | 2.86 ± 5.41          | 0.79 ± 0.85         |
| Akkermansiaceae                     | 0.81 ± 1.21          | 0.14 ± 0.11                | 1.66 ± 3.94          | 0.54 ± 0.70         |
| Streptococcaceae                    | 1.14 ± 1.83          | 2.69 ± 5.30                | 0.92 ± 1.46          | 0.73 ± 0.57         |
| Methanobacteriaceae                 | 2.11 ± 3.05          | 0.99 ± 1.51                | 1.77 ± 2.95          | 0.89 ± 1.75         |
| Eggerthellaceae                     | 3.41 ± 2.25          | 2.92 ± 1.14                | 4.05 ± 2.21          | 3.99 ± 2.00         |
| Erysipelatoclostridiaceae           | 1.10 ± 1.29          | 1.30 ± 0.78                | 1.43 ± 1.87          | 1.3 ± 0.69          |
| Erysipelotrichaceae                 | 1.53 ± 1.78          | 1.86 ± 2.43                | 1.28 ± 2.09          | 2.25 ± 2.47         |
| Clostridiaceae                      | 0.85 ± 0.55          | 0.64 ± 0.26                | 0.91 ± 0.65          | 1.36 ± 1.35         |
| Oscillospiraceae                    | 2.75 ± 1.50          | 2.40 ± 1.62                | 2.20 ± 1.76          | 2.29 ± 0.96         |
| Christensenellaceae                 | 1.70 ± 1.23          | 1.42 ± 0.64                | 1.10 ± 1.16          | 1.68 ± 1.35         |
| Eubacterium_coprostanoligenes_group | 1.25 ± 0.66          | 1.12 ± 0.36                | 1.19 ± 0.74          | 1.29 ± 0.57         |
| Others                              | 12.96 ± 10.20        | 14.93 ± 13.66              | 12.27 ± 10.54        | 8.47 ± 4.33         |
| SCFAs (mM)                          |                      |                            |                      |                     |
| Acetic acid                         | 37.13 ± 14.42        | 64.75 ± 18.37 <sup>+</sup> | 51.62 ± 30.02        | 44.51 ± 21.89       |
| Butyric acid                        | 9.23 ± 5.36          | 21.40 ± 8.95 <sup>+</sup>  | 12.13 ± 8.39         | 10.46 ± 4.41        |
| Propionic acid                      | 10.95 ± 5.27         | 18.08 ± 7.99 <sup>+</sup>  | 17.20 ± 9.66         | 12.49 ± 4.64        |
| Isobutyric acid                     | 0.83 ± 0.75          | 1.10 ± 1.55                | 0.98 ± 1.18          | 0.75 ± 0.53         |
| Isovaleric acid                     | 1.90 ± 1.11          | 2.24 ± 2.66                | 2.07 ± 1.68          | 1.74 ± 0.84         |
| Valeric acid                        | 1.84 ± 1.19          | 2.74 ± 2.13                | 1.60 ± 1.18          | 1.35 ± 0.66         |
| Caproic acid                        | 0.72 ± 1.04          | 1.12 ± 1.00                | 0.31 ± 0.59          | 0.15 ± 0.39         |
| Amino acids (mM)                    |                      |                            |                      |                     |
| Total amino acids                   | 49.29 ± 23.68        | 46.96 ± 28.64              | 52.49 ± 24.19        | 37.80 ± 9.13        |
| Protein amino acids                 | 48.27 ± 22.83        | 45.73 ± 27.36              | 50.93 ± 23.13        | 37.47 ± 9.22        |
| Biogenic amines                     | 0.86 ± 1.19          | 1.12 ± 1.86                | 1.39 ± 2.25          | 0.19 ± 0.26         |
| Ammonium                            | 27.53 ± 17.01        | 30.59 ± 18.65              | 31.74 ± 18.75        | 21.33 ± 7.85        |

Values are presented as mean ± standard deviation. (\*) Differential microbial family abundance according to linear effect size discriminant analysis (LEfSe) at a threshold of 2.0 for the comparison of samples from each category of consumption in diagnosis groups. (†) U Mann-Whitney statistically significant difference ( $p < 0.05$ ) in metabolite between the two levels of consumption in the diagnosis groups. O.T., other polyphenols; SCFAs, short chain fatty acids.

**Table S10.** Microbial abundance and faecal SCFAs, amino acids, biogenic amines and ammonium concentrations according to calcium intake (mg/day) category in each diagnosis group.

|                                     | Control       |                          | Polyps        |                           |
|-------------------------------------|---------------|--------------------------|---------------|---------------------------|
|                                     | Ca<900        | Ca≥900                   | Ca<900        | Ca≥900                    |
|                                     | (n=13)        | (n=12)                   | (n=19)        | (n=16)                    |
| Microbial families (% Abundance)    |               |                          |               |                           |
| Bifidobacteriaceae                  | 13.69 ± 15.62 | 12.35 ± 10.75            | 13.00 ± 12.41 | 8.90 ± 11.08              |
| Peptostreptococcaceae               | 3.67 ± 3.40   | 8.61 ± 10.74             | 3.57 ± 3.13   | 6.97 ± 6.74               |
| Prevotellaceae                      | 4.49 ± 7.70   | 2.26 ± 4.35              | 4.03 ± 6.19   | 3.65 ± 10.35              |
| Lachnospiraceae                     | 19.23 ± 6.53  | 20.46 ± 8.27             | 20.46 ± 8.07  | 23.78 ± 9.92              |
| Coriobacteriaceae                   | 4.84 ± 2.76   | 7.54 ± 4.97              | 11.00 ± 8.71  | 9.50 ± 9.65               |
| Enterobacteriaceae                  | 4.36 ± 6.53   | 1.50 ± 2.32              | 0.72 ± 1.01   | 1.50 ± 3.99               |
| Bacteroidaceae                      | 6.39 ± 9.06   | 3.39 ± 2.68              | 2.88 ± 2.61   | 6.03 ± 5.56               |
| Ruminococcaceae                     | 11.92 ± 4.56  | 12.99 ± 4.04             | 12.11 ± 4.09  | 11.75 ± 6.78              |
| Veillonellaceae                     | 2.04 ± 1.99   | 0.50 ± 0.38 *            | 3.53 ± 6.29   | 1.03 ± 1.36               |
| Akkermansiaceae                     | 0.54 ± 1.04   | 0.66 ± 1.08              | 0.53 ± 0.92   | 2.44 ± 4.96               |
| Streptococcaceae                    | 1.60 ± 4.23   | 1.67 ± 2.10              | 0.81 ± 0.99   | 0.94 ± 1.64               |
| Methanobacteriaceae                 | 1.34 ± 2.13   | 2.21 ± 3.19              | 2.66 ± 3.35   | 0.27 ± 0.33 *             |
| Eggerthellaceae                     | 3.00 ± 1.55   | 3.52 ± 2.35              | 4.21 ± 2.24   | 3.84 ± 2.06               |
| Erysipelatoclostridiaceae           | 1.22 ± 1.19   | 1.11 ± 1.13              | 1.14 ± 1.89   | 1.70 ± 1.34 *             |
| Erysipelotrichaceae                 | 1.95 ± 2.36   | 1.28 ± 1.45              | 1.59 ± 2.14   | 1.40 ± 2.30               |
| Clostridiaceae                      | 0.76 ± 0.47   | 0.81 ± 0.52              | 0.86 ± 0.61   | 1.19 ± 1.07               |
| Oscillospiraceae                    | 2.58 ± 1.48   | 2.70 ± 1.61              | 2.64 ± 1.49   | 1.73 ± 1.63               |
| Christensenellaceae                 | 1.61 ± 1.16   | 1.61 ± 1.03              | 1.49 ± 1.34   | 0.92 ± 0.98 *             |
| Eubacterium_coprostanoligenes_group | 1.11 ± 0.47   | 1.32 ± 0.68              | 1.44 ± 0.64   | 0.96 ± 0.69               |
| Others                              | 13.66 ± 11.50 | 13.50 ± 11.29            | 11.33 ± 8.05  | 11.49 ± 11.37             |
| SCFAs (mM)                          |               |                          |               |                           |
| Acetic acid                         | 51.94 ± 21.55 | 39.49 ± 17.31            | 38.88 ± 18.19 | 63.2 ± 32.66 <sup>+</sup> |
| Butyric acid                        | 13.70 ± 9.82  | 12.51 ± 7.75             | 9.73 ± 5.61   | 14.15 ± 9.13              |
| Propionic acid                      | 13.70 ± 7.99  | 12.71 ± 6.00             | 13.27 ± 7.56  | 19.51 ± 9.48 <sup>+</sup> |
| Isobutyric acid                     | 0.53 ± 0.59   | 1.33 ± 1.28 <sup>+</sup> | 0.92 ± 0.87   | 0.93 ± 1.29               |
| Isovaleric acid                     | 1.38 ± 1.09   | 2.69 ± 2.02 <sup>+</sup> | 2.15 ± 1.35   | 1.81 ± 1.74               |
| Valeric acid                        | 1.78 ± 0.86   | 2.50 ± 2.06              | 1.69 ± 1.14   | 1.37 ± 1.01               |
| Caproic acid                        | 0.98 ± 0.88   | 0.70 ± 1.19              | 0.36 ± 0.69   | 0.16 ± 0.30               |
| Amino acids (mM)                    |               |                          |               |                           |
| Total amino acids                   | 41.54 ± 26.83 | 56.14 ± 20.83            | 53.19 ± 24.02 | 44.31 ± 20.10             |
| Protein amino acids                 | 40.48 ± 25.87 | 55.01 ± 19.7             | 52.17 ± 23.24 | 42.73 ± 18.48             |
| Biogenic amines                     | 0.90 ± 1.32   | 0.99 ± 1.55              | 0.83 ± 1.35   | 1.46 ± 2.64               |
| Ammonium                            | 25.16 ± 18.68 | 32.14 ± 15.44            | 31.66 ± 19.29 | 26.63 ± 14.89             |

Values are presented as mean ± standard deviation. (\*) Differential microbial family abundance according to linear effect size discriminant analysis (LEfSe) at a threshold of 2.0 for the comparison of samples from each category of consumption in diagnosis groups. (<sup>+</sup>) U Mann-Whitney statistically significant difference (p < 0.05) in metabolite between the two levels of consumption in the diagnosis groups. Ca, Calcium; SCFAs, short chain fatty acids.

**Table S11.** Microbial abundance and faecal SCFAs, amino acids, biogenic amines and ammonium concentrations according to ethanol intake (g/day) category in each diagnosis group.

|                                     | Control       |                            | Polyps        |                            |
|-------------------------------------|---------------|----------------------------|---------------|----------------------------|
|                                     | Ethanol<12    | Ethanol≥12                 | Ethanol<12    | Ethanol≥12                 |
|                                     | (n=19)        | (n=6)                      | (n=23)        | (n=12)                     |
| Microbial families (% Abundance)    |               |                            |               |                            |
| Bifidobacteriaceae                  | 12.56 ± 11.74 | 14.60 ± 18.49              | 13.86 ± 13.51 | 5.88 ± 4.69                |
| Peptostreptococcaceae               | 7.36 ± 8.88   | 1.87 ± 0.79                | 3.52 ± 2.96   | 8.21 ± 7.33 *              |
| Prevotellaceae                      | 3.16 ± 6.50   | 4.22 ± 6.07                | 3.34 ± 5.81   | 4.84 ± 11.83               |
| Lachnospiraceae                     | 18.89 ± 6.57  | 22.79 ± 9.25               | 20.23 ± 8.92  | 25.34 ± 8.47               |
| Coriobacteriaceae                   | 5.94 ± 4.39   | 6.77 ± 3.42                | 11.62 ± 9.98  | 7.82 ± 6.59                |
| Enterobacteriaceae                  | 3.08 ± 5.47   | 2.69 ± 4.04                | 0.67 ± 0.91   | 1.87 ± 4.60                |
| Bacteroidaceae                      | 5.73 ± 7.67   | 2.47 ± 1.63                | 4.11 ± 4.83   | 4.73 ± 3.76                |
| Ruminococcaceae                     | 12.42 ± 4.25  | 12.47 ± 4.71               | 11.05 ± 5.33  | 13.66 ± 5.34               |
| Veillonellaceae                     | 1.32 ± 1.73   | 1.24 ± 1.43                | 3.44 ± 5.72   | 0.38 ± 0.33 *              |
| Akkermansiaceae                     | 0.75 ± 1.16   | 0.11 ± 0.10                | 1.95 ± 4.22   | 0.36 ± 0.60                |
| Streptococcaceae                    | 1.23 ± 1.78   | 2.92 ± 6.22                | 0.95 ± 1.53   | 0.73 ± 0.73                |
| Methanobacteriaceae                 | 2.10 ± 2.94   | 0.65 ± 1.08                | 1.35 ± 2.61   | 1.99 ± 3.00                |
| Eggerthellaceae                     | 3.32 ± 1.99   | 3.04 ± 2.01                | 3.85 ± 2.22   | 4.41 ± 2.00                |
| Erysipelatoclostridiaceae           | 1.12 ± 1.24   | 1.31 ± 0.81                | 1.19 ± 1.34   | 1.80 ± 2.16                |
| Erysipelotrichaceae                 | 1.55 ± 1.83   | 1.89 ± 2.53                | 1.20 ± 1.92   | 2.09 ± 2.61                |
| Clostridiaceae                      | 0.89 ± 0.51   | 0.46 ± 0.15                | 0.80 ± 0.62   | 1.41 ± 1.11                |
| Oscillospiraceae                    | 2.88 ± 1.62   | 1.88 ± 0.80                | 2.34 ± 1.73   | 2.00 ± 1.35                |
| Christensenellaceae                 | 1.79 ± 1.15   | 1.04 ± 0.52                | 1.13 ± 1.27   | 1.42 ± 1.11                |
| Eubacterium_coprostanoligenes_group | 1.29 ± 0.64   | 0.96 ± 0.23                | 1.16 ± 0.73   | 1.32 ± 0.63                |
| Others                              | 12.62 ± 10.11 | 16.63 ± 14.68              | 12.26 ± 10.63 | 9.75 ± 7.22                |
| SCFAs (mM)                          |               |                            |               |                            |
| Acetic acid                         | 43.06 ± 21.08 | 55.17 ± 15.31              | 48.59 ± 30.67 | 52.69 ± 23.88              |
| Butyric acid                        | 11.64 ± 7.99  | 17.83 ± 10.03              | 11.78 ± 8.36  | 11.68 ± 6.39               |
| Propionic acid                      | 12.38 ± 7.46  | 15.91 ± 4.70               | 16.44 ± 9.58  | 15.51 ± 7.93               |
| Isobutyric acid                     | 0.97 ± 1.18   | 0.74 ± 0.43                | 0.93 ± 0.94   | 0.92 ± 1.32                |
| Isovaleric acid                     | 2.13 ± 1.91   | 1.63 ± 0.77                | 2.13 ± 1.56   | 1.75 ± 1.49                |
| Valeric acid                        | 2.02 ± 1.69   | 2.46 ± 1.12                | 1.50 ± 0.99   | 1.64 ± 1.29                |
| Caproic acid                        | 0.83 ± 1.07   | 0.91 ± 0.97                | 0.13 ± 0.29   | 0.53 ± 0.81                |
| Amino acids (mM)                    |               |                            |               |                            |
| Total amino acids                   | 45.64 ± 26.59 | 57.77 ± 16.41              | 54.89 ± 23.22 | 38.09 ± 16.62 <sup>+</sup> |
| Protein amino acids                 | 44.55 ± 25.41 | 56.67 ± 16.3               | 53.39 ± 22.31 | 37.25 ± 15.41 <sup>+</sup> |
| Biogenic amines                     | 0.95 ± 1.46   | 0.91 ± 1.33                | 1.33 ± 2.32   | 0.72 ± 1.33                |
| Ammonium                            | 26.37 ± 18.49 | 35.28 ± 10.98 <sup>+</sup> | 33.18 ± 18.67 | 22.04 ± 12.04              |

Values are presented as mean ± standard deviation. (\*) Differential microbial family abundance according to linear effect size discriminant analysis (LEfSe) at a threshold of 2.0 for the comparison of samples from each category of consumption in diagnosis groups. (†) U Mann-Whitney statistically significant difference (p < 0.05) in metabolite between the two levels of consumption in the diagnosis groups. SCFAs, short chain fatty acids.

**Table S12.** Microbial abundance and faecal SCFAs, amino acids, biogenic amines and ammonium concentrations according to dibenzo (a) anthracene intake ( $\mu\text{g}/\text{day}$ ) category in each diagnosis group.

|                                     | Control                |                              | Polyps                 |                               |
|-------------------------------------|------------------------|------------------------------|------------------------|-------------------------------|
|                                     | DiB(a)A<0.07<br>(n=19) | DiB(a)A $\geq$ 0.07<br>(n=6) | DiB(a)A<0.07<br>(n=24) | DiB(a)A $\geq$ 0.07<br>(n=11) |
| Microbial families (% Abundance)    |                        |                              |                        |                               |
| Bifidobacteriaceae                  | 12.45 $\pm$ 11.76      | 14.94 $\pm$ 18.41            | 11.92 $\pm$ 13.44      | 9.39 $\pm$ 7.46               |
| Peptostreptococcaceae               | 7.17 $\pm$ 8.95        | 2.49 $\pm$ 1.91              | 4.50 $\pm$ 4.09        | 6.49 $\pm$ 7.36               |
| Prevotellaceae                      | 3.38 $\pm$ 6.53        | 3.54 $\pm$ 6.03              | 3.25 $\pm$ 5.69        | 5.17 $\pm$ 12.35              |
| Lachnospiraceae                     | 18.64 $\pm$ 6.36       | 23.56 $\pm$ 9.33             | 21.47 $\pm$ 9.42       | 23.09 $\pm$ 8.28              |
| Coriobacteriaceae                   | 5.88 $\pm$ 4.40        | 6.95 $\pm$ 3.33              | 10.81 $\pm$ 9.80       | 9.24 $\pm$ 7.45               |
| Enterobacteriaceae                  | 3.59 $\pm$ 5.62        | 1.07 $\pm$ 2.15              | 0.69 $\pm$ 0.90        | 1.92 $\pm$ 4.82               |
| Bacteroidaceae                      | 5.68 $\pm$ 7.69        | 2.63 $\pm$ 1.67              | 3.24 $\pm$ 3.45        | 6.69 $\pm$ 5.55               |
| Ruminococcaceae                     | 12.01 $\pm$ 3.97       | 13.79 $\pm$ 5.26             | 11.64 $\pm$ 5.69       | 12.61 $\pm$ 4.91              |
| Veillonellaceae                     | 1.31 $\pm$ 1.73        | 1.27 $\pm$ 1.44              | 2.94 $\pm$ 5.71        | 1.19 $\pm$ 1.42               |
| Akkermansiaceae                     | 0.74 $\pm$ 1.16        | 0.13 $\pm$ 0.13              | 1.06 $\pm$ 2.28        | 2.16 $\pm$ 5.36               |
| Streptococcaceae                    | 2.02 $\pm$ 3.74        | 0.41 $\pm$ 0.16              | 1.00 $\pm$ 1.520       | 0.59 $\pm$ 0.57               |
| Methanobacteriaceae                 | 2.07 $\pm$ 2.96        | 0.74 $\pm$ 1.06              | 1.74 $\pm$ 3.07        | 1.18 $\pm$ 1.81               |
| Eggerthellaceae                     | 3.34 $\pm$ 1.99        | 2.99 $\pm$ 2.01              | 4.11 $\pm$ 2.09        | 3.89 $\pm$ 2.33               |
| Erysipelatoclostridiaceae           | 1.12 $\pm$ 1.24        | 1.33 $\pm$ 0.78              | 1.27 $\pm$ 1.33        | 1.69 $\pm$ 2.28               |
| Erysipelotrichaceae                 | 1.23 $\pm$ 1.44        | 2.89 $\pm$ 2.92              | 1.37 $\pm$ 1.96        | 1.80 $\pm$ 2.69               |
| Clostridiaceae                      | 0.87 $\pm$ 0.52        | 0.53 $\pm$ 0.22              | 1.03 $\pm$ 0.92        | 0.97 $\pm$ 0.73               |
| Oscillospiraceae                    | 2.79 $\pm$ 1.63        | 2.16 $\pm$ 1.02              | 2.40 $\pm$ 1.82        | 1.83 $\pm$ 0.89               |
| Christensenellaceae                 | 1.74 $\pm$ 1.14        | 1.18 $\pm$ 0.76              | 1.23 $\pm$ 1.24        | 1.24 $\pm$ 1.20               |
| Eubacterium_coprostanoligenes_group | 1.26 $\pm$ 0.64        | 1.05 $\pm$ 0.31              | 1.21 $\pm$ 0.71        | 1.22 $\pm$ 0.68               |
| Others                              | 12.71 $\pm$ 10.04      | 16.36 $\pm$ 14.95            | 13.13 $\pm$ 10.52      | 7.64 $\pm$ 5.79               |
| SCFAs (mM)                          |                        |                              |                        |                               |
| Acetic acid                         | 42.85 $\pm$ 20.64      | 55.85 $\pm$ 16.73            | 51.3 $\pm$ 30.77       | 47.15 $\pm$ 22.78             |
| Butyric acid                        | 12.02 $\pm$ 8.85       | 16.63 $\pm$ 8.00             | 12.37 $\pm$ 8.19       | 10.38 $\pm$ 6.42              |
| Propionic acid                      | 12.71 $\pm$ 7.68       | 14.87 $\pm$ 4.10             | 15.83 $\pm$ 9.27       | 16.76 $\pm$ 8.54              |
| Isobutyric acid                     | 0.97 $\pm$ 1.18        | 0.73 $\pm$ 0.43              | 0.82 $\pm$ 0.95        | 1.15 $\pm$ 1.30               |
| Isovaleric acid                     | 2.13 $\pm$ 1.91        | 1.64 $\pm$ 0.75              | 1.95 $\pm$ 1.60        | 2.11 $\pm$ 1.41               |
| Valeric acid                        | 2.02 $\pm$ 1.69        | 2.45 $\pm$ 1.13              | 1.43 $\pm$ 0.99        | 1.80 $\pm$ 1.28               |
| Caproic acid                        | 0.81 $\pm$ 1.05        | 0.95 $\pm$ 1.03              | 0.21 $\pm$ 0.53        | 0.40 $\pm$ 0.60               |
| Amino acids (mM)                    |                        |                              |                        |                               |
| Total amino acids                   | 46.87 $\pm$ 26.54      | 53.85 $\pm$ 19.16            | 52.59 $\pm$ 24.44      | 41.57 $\pm$ 15.72             |
| Protein amino acids                 | 45.60 $\pm$ 25.33      | 53.33 $\pm$ 18.94            | 51.14 $\pm$ 23.51      | 40.68 $\pm$ 14.45             |
| Biogenic amines                     | 1.12 $\pm$ 1.55        | 0.38 $\pm$ 0.50              | 1.29 $\pm$ 2.28        | 0.75 $\pm$ 1.38               |
| Ammonium                            | 27.29 $\pm$ 18.68      | 32.36 $\pm$ 11.95            | 32.21 $\pm$ 18.92      | 23.14 $\pm$ 11.77             |

Values are presented as mean  $\pm$  standard deviation. (\*) Differential microbial family abundance according to linear effect size discriminant analysis (LEfSe) at a threshold of 2.0 for the comparison of samples from each category of consumption in diagnosis groups. No significant differences were found by U Mann-Whitney analysis ( $p < 0.05$ ) of metabolites between the two consumption levels. DiB(a)A, dibenzo (a) anthracene; SCFAs, short chain fatty acids.

**Table S13.** Microbial abundance and faecal SCFAs, amino acids, biogenic amines and ammonium concentrations according to total polycyclic aromatic hydrocarbons intake ( $\mu\text{g}/\text{day}$ ) category in each diagnosis group.

|                                     | Control            |                                | Polyps              |                                |
|-------------------------------------|--------------------|--------------------------------|---------------------|--------------------------------|
|                                     | PAHs<0.75<br>(n=9) | PAHs $\geq$ 0.75<br>(n=16)     | PAHs<0.75<br>(n=10) | PAHs $\geq$ 0.75<br>(n=25)     |
| Microbial families (% Abundance)    |                    |                                |                     |                                |
| Bifidobacteriaceae                  | 9.95 $\pm$ 13.19   | 14.79 $\pm$ 13.38              | 11.83 $\pm$ 10.43   | 10.85 $\pm$ 12.54              |
| Peptostreptococcaceae               | 2.61 $\pm$ 2.36    | 7.97 $\pm$ 9.49 *              | 5.01 $\pm$ 4.01     | 5.17 $\pm$ 5.82                |
| Prevotellaceae                      | 4.75 $\pm$ 6.37    | 2.67 $\pm$ 6.33                | 2.76 $\pm$ 5.51     | 4.30 $\pm$ 9.15                |
| Lachnospiraceae                     | 21.03 $\pm$ 5.60   | 19.14 $\pm$ 8.18               | 19.31 $\pm$ 7.24    | 23.05 $\pm$ 9.52               |
| Coriobacteriaceae                   | 3.02 $\pm$ 1.99    | 7.89 $\pm$ 4.01 *              | 9.62 $\pm$ 9.95     | 10.59 $\pm$ 8.86               |
| Enterobacteriaceae                  | 4.25 $\pm$ 5.78    | 2.27 $\pm$ 4.71                | 0.47 $\pm$ 0.45     | 1.32 $\pm$ 3.26                |
| Bacteroidaceae                      | 9.01 $\pm$ 9.99    | 2.67 $\pm$ 2.45 *              | 5.97 $\pm$ 6.01     | 3.66 $\pm$ 3.59                |
| Ruminococcaceae                     | 13.25 $\pm$ 4.65   | 11.98 $\pm$ 4.12               | 12.91 $\pm$ 2.56    | 11.56 $\pm$ 6.20               |
| Veillonellaceae                     | 1.09 $\pm$ 1.18    | 1.42 $\pm$ 1.87                | 3.16 $\pm$ 5.42     | 2.08 $\pm$ 4.66                |
| Akkermansiaceae                     | 0.73 $\pm$ 1.22    | 0.52 $\pm$ 0.96                | 1.77 $\pm$ 3.28     | 1.26 $\pm$ 3.63                |
| Streptococcaceae                    | 2.12 $\pm$ 5.08    | 1.36 $\pm$ 1.89                | 1.21 $\pm$ 1.23     | 0.74 $\pm$ 1.33                |
| Methanobacteriaceae                 | 0.29 $\pm$ 0.39    | 2.57 $\pm$ 3.06 *              | 2.65 $\pm$ 3.96     | 1.13 $\pm$ 1.99                |
| Eggerthellaceae                     | 2.27 $\pm$ 0.83    | 3.80 $\pm$ 2.20 *              | 3.70 $\pm$ 1.72     | 4.18 $\pm$ 2.30                |
| Erysipelatoclostridiaceae           | 0.77 $\pm$ 0.55    | 1.39 $\pm$ 1.33                | 0.68 $\pm$ 0.34     | 1.69 $\pm$ 1.89                |
| Erysipelotrichaceae                 | 0.93 $\pm$ 2.03    | 2.02 $\pm$ 1.88 *              | 1.11 $\pm$ 1.53     | 1.66 $\pm$ 2.40                |
| Clostridiaceae                      | 0.61 $\pm$ 0.32    | 0.88 $\pm$ 0.53                | 0.84 $\pm$ 0.69     | 1.08 $\pm$ 0.92                |
| Oscillospiraceae                    | 2.30 $\pm$ 1.20    | 2.83 $\pm$ 1.67                | 3.05 $\pm$ 1.78     | 1.89 $\pm$ 1.43                |
| Christensenellaceae                 | 1.43 $\pm$ 1.06    | 1.71 $\pm$ 1.10                | 1.88 $\pm$ 1.43     | 0.97 $\pm$ 1.02 *              |
| Eubacterium_coprostanoligenes_group | 1.03 $\pm$ 0.42    | 1.32 $\pm$ 0.64                | 1.43 $\pm$ 0.64     | 1.13 $\pm$ 0.71                |
| Others                              | 18.56 $\pm$ 13.26  | 10.79 $\pm$ 9.08               | 10.64 $\pm$ 6.39    | 11.71 $\pm$ 10.67              |
| SCFAs (mM)                          |                    |                                |                     |                                |
| Acetic acid                         | 56.72 $\pm$ 23.11  | 39.92 $\pm$ 16.21              | 33.27 $\pm$ 15.84   | 56.69 $\pm$ 29.52 <sup>+</sup> |
| Butyric acid                        | 16.39 $\pm$ 10.45  | 11.29 $\pm$ 7.32               | 8.29 $\pm$ 4.21     | 13.13 $\pm$ 8.31               |
| Propionic acid                      | 14.92 $\pm$ 9.36   | 12.27 $\pm$ 5.34               | 11.19 $\pm$ 7.04    | 18.10 $\pm$ 8.96 <sup>+</sup>  |
| Isobutyric acid                     | 0.39 $\pm$ 0.42    | 1.21 $\pm$ 1.18 <sup>+</sup>   | 0.85 $\pm$ 0.41     | 0.95 $\pm$ 1.24                |
| Isovaleric acid                     | 1.10 $\pm$ 0.79    | 2.52 $\pm$ 1.88 <sup>+</sup>   | 2.08 $\pm$ 0.53     | 1.96 $\pm$ 1.78                |
| Valeric acid                        | 1.69 $\pm$ 0.76    | 2.37 $\pm$ 1.85                | 1.36 $\pm$ 0.67     | 1.62 $\pm$ 1.21                |
| Caproic acid                        | 0.94 $\pm$ 0.97    | 0.79 $\pm$ 1.08                | 0.18 $\pm$ 0.36     | 0.30 $\pm$ 0.61                |
| Amino acids (mM)                    |                    |                                |                     |                                |
| Total amino acids                   | 35.93 $\pm$ 21.01  | 55.64 $\pm$ 24.45 <sup>+</sup> | 42.78 $\pm$ 10.79   | 51.67 $\pm$ 25.42              |
| Protein amino acids                 | 35.07 $\pm$ 20.76  | 54.43 $\pm$ 23.11 <sup>+</sup> | 42.15 $\pm$ 10.86   | 50.14 $\pm$ 24.24              |
| Biogenic amines                     | 0.75 $\pm$ 1.23    | 1.05 $\pm$ 1.52                | 0.48 $\pm$ 1.26     | 1.37 $\pm$ 2.24 <sup>+</sup>   |
| Ammonium                            | 23.58 $\pm$ 15.02  | 31.28 $\pm$ 18.20              | 25.78 $\pm$ 11.89   | 30.79 $\pm$ 19.14              |

Values are presented as mean  $\pm$  standard deviation. (\*) Differential microbial family abundance according to linear effect size discriminant analysis (LEfSe) at a threshold of 2.0 for the comparison of samples from each category of consumption in diagnosis groups. (<sup>+</sup>) U Mann-Whitney statistically significant difference ( $p < 0.05$ ) in metabolite between the two levels of consumption in the diagnosis groups. PAHs, polycyclic aromatic hydrocarbons; SCFAs, short chain fatty acids.

**Table S14.** Microbial abundance and faecal SCFAs, amino acids, biogenic amines and ammonium concentrations according to 2-amino-1-methyl-6-phenylimidazo intake (ng/day) category in each diagnosis group.

|                                     | Control          |                   | Polyps            |                            |
|-------------------------------------|------------------|-------------------|-------------------|----------------------------|
|                                     | PhIP<40<br>(n=8) | PhIP≥40<br>(n=17) | PhIP<40<br>(n=12) | PhIP≥40<br>(n=23)          |
| Microbial families (% Abundance)    |                  |                   |                   |                            |
| Bifidobacteriaceae                  | 14.27 ± 14.15    | 12.48 ± 13.21     | 9.80 ± 9.33       | 11.82 ± 13.1               |
| Peptostreptococcaceae               | 6.52 ± 11.28     | 5.82 ± 6.46       | 6.60 ± 7.23       | 4.36 ± 3.94                |
| Prevotellaceae                      | 1.45 ± 1.96      | 4.34 ± 7.41       | 4.00 ± 11.73      | 3.78 ± 5.97                |
| Lachnospiraceae                     | 17.29 ± 5.57     | 21.02 ± 7.83      | 21.71 ± 10.40     | 22.12 ± 8.41               |
| Coriobacteriaceae                   | 4.38 ± 3.02      | 6.96 ± 4.40       | 8.38 ± 6.93       | 11.32 ± 9.97               |
| Enterobacteriaceae                  | 4.28 ± 6.10      | 2.38 ± 4.62       | 1.82 ± 4.59       | 0.69 ± 0.97                |
| Bacteroidaceae                      | 4.81 ± 4.98      | 5.02 ± 7.69       | 5.22 ± 4.66       | 3.85 ± 4.36                |
| Ruminococcaceae                     | 11.32 ± 3.82     | 12.96 ± 4.47      | 11.20 ± 3.56      | 12.34 ± 6.19               |
| Veillonellaceae                     | 1.40 ± 1.53      | 1.25 ± 1.72       | 4.40 ± 7.53       | 1.34 ± 2.08                |
| Akkermansiaceae                     | 1.33 ± 1.37      | 0.25 ± 0.64 *     | 1.53 ± 3.07       | 1.34 ± 3.77                |
| Streptococcaceae                    | 2.83 ± 5.51      | 1.07 ± 1.45       | 1.05 ± 1.17       | 0.78 ± 1.39                |
| Methanobacteriaceae                 | 1.52 ± 2.68      | 1.87 ± 2.75       | 1.72 ± 3.66       | 1.49 ± 2.18                |
| Eggerthellaceae                     | 2.88 ± 1.97      | 3.43 ± 1.98       | 4.57 ± 2.26       | 3.76 ± 2.06                |
| Erysipelatoclostridiaceae           | 1.04 ± 1.18      | 1.23 ± 1.15       | 0.83 ± 0.68       | 1.70 ± 1.94                |
| Erysipelotrichaceae                 | 1.10 ± 1.80      | 1.88 ± 2.04       | 2.03 ± 2.41       | 1.23 ± 2.06                |
| Clostridiaceae                      | 0.81 ± 0.60      | 0.77 ± 0.43       | 1.04 ± 0.71       | 1.00 ± 0.94                |
| Oscillospiraceae                    | 3.15 ± 1.80      | 2.40 ± 1.35       | 2.75 ± 1.82       | 1.95 ± 1.44                |
| Christensenellaceae                 | 1.61 ± 0.93      | 1.61 ± 1.16       | 1.35 ± 1.07       | 1.17 ± 1.29                |
| Eubacterium_coprostanoligenes_group | 1.22 ± 0.83      | 1.21 ± 0.45       | 1.43 ± 0.60       | 1.10 ± 0.73                |
| Others                              | 16.79 ± 11.36    | 12.08 ± 11.09     | 8.58 ± 6.23       | 12.88 ± 10.74              |
| SCFAs (mM)                          |                  |                   |                   |                            |
| Acetic acid                         | 42.1 ± 20.44     | 47.79 ± 20.52     | 38.67 ± 25.22     | 55.90 ± 28.41 <sup>+</sup> |
| Butyric acid                        | 11.37 ± 10.36    | 13.96 ± 8.06      | 9.76 ± 6.32       | 12.79 ± 8.18               |
| Propionic acid                      | 10.63 ± 6.20     | 14.45 ± 7.16      | 14.11 ± 9.35      | 17.18 ± 8.73               |
| Isobutyric acid                     | 0.75 ± 0.73      | 0.99 ± 1.18       | 1.30 ± 1.35       | 0.73 ± 0.86                |
| Isovaleric acid                     | 1.73 ± 1.11      | 2.14 ± 1.94       | 2.59 ± 1.65       | 1.69 ± 1.39                |
| Valeric acid                        | 1.40 ± 0.51      | 2.47 ± 1.78       | 1.38 ± 0.75       | 1.63 ± 1.23                |
| Caproic acid                        | 0.43 ± 0.69      | 1.04 ± 1.11       | 0.13 ± 0.30       | 0.34 ± 0.64                |
| Amino acids (mM)                    |                  |                   |                   |                            |
| Total amino acids                   | 43.87 ± 19.56    | 50.75 ± 27.16     | 49.51 ± 24.55     | 48.93 ± 21.84              |
| Protein amino acids                 | 42.95 ± 18.68    | 49.58 ± 26.14     | 48.42 ± 24.09     | 47.56 ± 20.49              |
| Biogenic amines                     | 0.77 ± 1.21      | 1.03 ± 1.52       | 0.95 ± 1.34       | 1.21 ± 2.34                |
| Ammonium                            | 26.72 ± 8.19     | 29.35 ± 20.32     | 32.1 ± 22.09      | 27.93 ± 14.67              |

Values are presented as mean ± standard deviation. (\*) Differential microbial family abundance according to linear effect size discriminant analysis (LEfSe) at a threshold of 2.0 for the comparison of samples from each category of consumption in diagnosis groups. (†) U Mann-Whitney statistically significant difference (p < 0.05) in metabolite between the two levels of consumption in the diagnosis groups. PhIP, 2-amino-1-methyl-6-phenylimidazo (4,5,b) pyridine; SCFAs, short chain fatty acids.

**Table S15.** Microbial abundance and faecal SCFAs, amino acids, biogenic amines and ammonium concentrations according to 2-amino-3,8 dimethylimidazo intake (ng/day) category in each diagnosis group.

|                                     | Control            |                          | Polyps             |                   |
|-------------------------------------|--------------------|--------------------------|--------------------|-------------------|
|                                     | MelQx<50<br>(n=17) | MelQx≥50<br>(n=8)        | MelQx<50<br>(n=28) | MelQx≥50<br>(n=7) |
| Microbial families (% Abundance)    |                    |                          |                    |                   |
| Bifidobacteriaceae                  | 12.96 ± 11.64      | 13.24 ± 17.08            | 12.23 ± 12.86      | 6.73 ± 4.59       |
| Peptostreptococcaceae               | 6.31 ± 9.45        | 5.49 ± 4.28              | 5.11 ± 5.67        | 5.18 ± 3.84       |
| Prevotellaceae                      | 2.28 ± 3.77        | 5.84 ± 9.66              | 4.37 ± 9.05        | 1.81 ± 2.96       |
| Lachnospiraceae                     | 19.20 ± 6.94       | 21.14 ± 8.30             | 20.75 ± 8.55       | 26.91 ± 9.66      |
| Coriobacteriaceae                   | 4.80 ± 3.00        | 8.98 ± 4.93              | 9.35 ± 9.41        | 14.18 ± 6.59      |
| Enterobacteriaceae                  | 3.59 ± 5.86        | 1.71 ± 2.74              | 1.14 ± 3.09        | 0.85 ± 0.82       |
| Bacteroidaceae                      | 6.33 ± 7.76        | 2.02 ± 2.85 *            | 4.96 ± 4.74        | 1.78 ± 1.31       |
| Ruminococcaceae                     | 11.97 ± 3.71       | 13.41 ± 5.41             | 11.20 ± 5.35       | 14.92 ± 4.86      |
| Veillonellaceae                     | 1.10 ± 1.34        | 1.74 ± 2.17              | 2.88 ± 5.30        | 0.41 ± 0.29       |
| Akkermansiaceae                     | 0.84 ± 1.20        | 0.07 ± 0.05 *            | 1.62 ± 3.86        | 0.53 ± 1.12       |
| Streptococcaceae                    | 2.05 ± 3.94        | 0.74 ± 0.95              | 0.88 ± 1.30        | 0.86 ± 1.44       |
| Methanobacteriaceae                 | 1.73 ± 2.80        | 1.80 ± 2.56              | 1.49 ± 2.90        | 1.88 ± 2.03       |
| Eggerthellaceae                     | 3.26 ± 2.19        | 3.23 ± 1.46              | 4.04 ± 2.21        | 4.05 ± 1.98       |
| Erysipelatoclostridiaceae           | 0.84 ± 0.86        | 1.86 ± 1.40 *            | 1.13 ± 1.16        | 2.47 ± 2.83       |
| Erysipelotrichaceae                 | 1.38 ± 1.85        | 2.18 ± 2.23              | 1.17 ± 1.80        | 2.84 ± 3.13       |
| Clostridiaceae                      | 0.83 ± 0.52        | 0.69 ± 0.41              | 0.95 ± 0.90        | 1.27 ± 0.64       |
| Oscillospiraceae                    | 2.77 ± 1.49        | 2.37 ± 1.64              | 2.32 ± 1.74        | 1.83 ± 0.76       |
| Christensenellaceae                 | 1.65 ± 1.08        | 1.52 ± 1.12              | 1.28 ± 1.34        | 1.02 ± 0.40       |
| Eubacterium_coprostanoligenes_group | 1.15 ± 0.64        | 1.34 ± 0.43              | 1.16 ± 0.65        | 1.45 ± 0.87       |
| Others                              | 14.98 ± 11.93      | 10.63 ± 9.35             | 11.99 ± 9.97       | 9.05 ± 7.91       |
| SCFAs (mM)                          |                    |                          |                    |                   |
| Acetic acid                         | 42.43 ± 21.09      | 53.49 ± 17.15            | 48.16 ± 28.19      | 57.33 ± 29.36     |
| Butyric acid                        | 11.46 ± 8.86       | 16.67 ± 7.78             | 10.97 ± 7.35       | 14.84 ± 8.60      |
| Propionic acid                      | 11.78 ± 5.65       | 16.30 ± 8.84             | 15.63 ± 9.40       | 18.11 ± 7.00      |
| Isobutyric acid                     | 0.75 ± 0.68        | 1.27 ± 1.58              | 0.97 ± 1.13        | 0.75 ± 0.83       |
| Isovaleric acid                     | 1.74 ± 1.09        | 2.59 ± 2.59              | 2.08 ± 1.59        | 1.68 ± 1.25       |
| Valeric acid                        | 1.68 ± 1.02        | 3.08 ± 2.12 <sup>+</sup> | 1.40 ± 0.93        | 2.12 ± 1.50       |
| Caproic acid                        | 0.48 ± 0.75        | 1.63 ± 1.13 <sup>+</sup> | 0.17 ± 0.32        | 0.66 ± 1.01       |
| Amino acids (mM)                    |                    |                          |                    |                   |
| Total amino acids                   | 47.92 ± 24.28      | 49.88 ± 27.48            | 48.85 ± 21.97      | 50.25 ± 26.08     |
| Protein amino acids                 | 47.09 ± 23.41      | 48.24 ± 26.29            | 47.71 ± 21.04      | 48.44 ± 24.70     |
| Biogenic amines                     | 0.68 ± 1.17        | 1.50 ± 1.77              | 1.00 ± 2.08        | 1.59 ± 1.92       |
| Ammonium                            | 28.41 ± 17.48      | 28.72 ± 17.83            | 30.44 ± 18.18      | 25.03 ± 13.87     |

Values are presented as mean ± standard deviation. (\*) Differential microbial family abundance according to linear effect size discriminant analysis (LEfSe) at a threshold of 2.0 for the comparison of samples from each category of consumption in diagnosis groups. (<sup>+</sup>) U Mann-Whitney statistically significant difference (p < 0.05) in metabolite between the two levels of consumption in the diagnosis groups. MelQx, 2-amino-3,8 dimethylimidazo (4,5,f) quinoxaline; SCFAs, short chain fatty acids.

**Table S16.** Microbial abundance and faecal SCFAs, amino acids, biogenic amines and ammonium concentrations according to nitrites intake (mg/day) category in each diagnosis group.

|                                     | Control                |                         | Polyps                  |                         |
|-------------------------------------|------------------------|-------------------------|-------------------------|-------------------------|
|                                     | Nitrites<1.69<br>(n=6) | Nitrites≥1.69<br>(n=19) | Nitrites<1.69<br>(n=12) | Nitrites≥1.69<br>(n=23) |
| Microbial families (% Abundance)    |                        |                         |                         |                         |
| Bifidobacteriaceae                  | 23.98 ± 11.58          | 9.60 ± 12.01 *          | 17.28 ± 13.77           | 7.92 ± 9.50 *           |
| Peptostreptococcaceae               | 12.94 ± 13.91          | 3.87 ± 3.48             | 3.32 ± 2.66             | 6.06 ± 6.10             |
| Prevotellaceae                      | 2.32 ± 2.14            | 3.77 ± 7.14 *           | 3.59 ± 5.51             | 3.99 ± 9.45             |
| Lachnospiraceae                     | 16.26 ± 6.26           | 20.95 ± 7.37            | 20.60 ± 9.06            | 22.70 ± 9.07            |
| Coriobacteriaceae                   | 5.44 ± 2.39            | 6.36 ± 4.58             | 11.32 ± 6.79            | 9.79 ± 10.13            |
| Enterobacteriaceae                  | 1.91 ± 3.84            | 3.32 ± 5.47             | 0.34 ± 0.41             | 1.46 ± 3.38             |
| Bacteroidaceae                      | 2.33 ± 1.20            | 5.78 ± 7.67             | 4.00 ± 3.80             | 4.49 ± 4.82             |
| Ruminococcaceae                     | 10.74 ± 4.32           | 12.97 ± 4.22            | 10.25 ± 5.21            | 12.83 ± 5.40            |
| Veillonellaceae                     | 1.36 ± 1.14            | 1.28 ± 1.79             | 2.95 ± 6.21             | 2.09 ± 4.06             |
| Akkermansiaceae                     | 0.70 ± 0.93            | 0.56 ± 1.10             | 2.08 ± 5.14             | 1.05 ± 2.30             |
| Streptococcaceae                    | 4.40 ± 5.96            | 0.76 ± 1.18             | 0.76 ± 0.73             | 0.93 ± 1.53             |
| Methanobacteriaceae                 | 0.39 ± 0.42            | 2.18 ± 2.94             | 1.51 ± 2.43             | 1.60 ± 2.92             |
| Eggerthellaceae                     | 2.49 ± 0.75            | 3.49 ± 2.16             | 3.99 ± 2.55             | 4.07 ± 1.95             |
| Erysipelatoclostridiaceae           | 0.45 ± 0.20            | 1.40 ± 1.22 *           | 1.21 ± 1.57             | 1.50 ± 1.74             |
| Erysipelotrichaceae                 | 0.91 ± 0.76            | 1.86 ± 2.18             | 1.71 ± 2.54             | 1.40 ± 2.02             |
| Clostridiaceae                      | 0.96 ± 0.64            | 0.73 ± 0.43             | 0.81 ± 0.67             | 1.11 ± 0.93             |
| Oscillospiraceae                    | 2.58 ± 1.40            | 2.66 ± 1.58             | 2.26 ± 1.55             | 2.20 ± 1.66             |
| Christensenellaceae                 | 1.36 ± 0.37            | 1.69 ± 1.21             | 1.60 ± 1.71             | 1.04 ± 0.82             |
| Eubacterium_coprostanoligenes_group | 1.23 ± 0.74            | 1.21 ± 0.54             | 0.97 ± 0.77             | 1.34 ± 0.63 *           |
| Others                              | 7.27 ± 4.41            | 15.58 ± 11.97           | 9.44 ± 6.99             | 12.42 ± 10.66           |
| SCFAs (mM)                          |                        |                         |                         |                         |
| Acetic acid                         | 39.41 ± 23.77          | 48.04 ± 19.25           | 44.50 ± 21.73           | 52.86 ± 31.15           |
| Butyric acid                        | 12.44 ± 11.28          | 13.34 ± 8.12            | 9.69 ± 5.20             | 12.82 ± 8.56            |
| Propionic acid                      | 11.14 ± 7.74           | 13.89 ± 6.81            | 15.85 ± 9.80            | 16.27 ± 8.68            |
| Isobutyric acid                     | 0.75 ± 0.80            | 0.97 ± 1.12             | 1.01 ± 0.89             | 0.88 ± 1.16             |
| Isovaleric acid                     | 1.70 ± 0.98            | 2.11 ± 1.89             | 2.27 ± 1.47             | 1.85 ± 1.56             |
| Valeric acid                        | 1.60 ± 0.62            | 2.29 ± 1.74             | 1.48 ± 0.84             | 1.58 ± 1.20             |
| Caproic acid                        | 0.63 ± 0.79            | 0.92 ± 1.10             | 0.08 ± 0.14             | 0.37 ± 0.66             |
| Amino acids (mM)                    |                        |                         |                         |                         |
| Total amino acids                   | 50.00 ± 19.31          | 48.09 ± 26.73           | 58.82 ± 28.18           | 44.07 ± 17.42           |
| Protein amino acids                 | 48.86 ± 18.42          | 47.01 ± 25.72           | 57.34 ± 26.80           | 42.91 ± 16.62           |
| Biogenic amines                     | 0.93 ± 1.38            | 0.95 ± 1.45             | 1.29 ± 2.48             | 1.03 ± 1.81             |
| Ammonium                            | 25.66 ± 8.86           | 29.41 ± 19.23           | 35.82 ± 22.69           | 25.99 ± 13.17           |

Values are presented as mean ± standard deviation. (\*) Differential microbial family abundance according to linear effect size discriminant analysis (LEfSe) at a threshold of 2.0 for the comparison of samples from each category of consumption in diagnosis groups. No significant differences were found by U Mann-Whitney analysis ( $p < 0.05$ ) of metabolites between the two consumption levels. SCFAs, short chain fatty acids.



**Table S17.** Differences in microbial abundance and faecal SCFAs and amino acids concentrations according to N-nitrosodimethylamine intake ( $\mu\text{g}/\text{day}$ ) category in each diagnosis group.

|                                     | Control             |                             | Polyps               |                             |
|-------------------------------------|---------------------|-----------------------------|----------------------|-----------------------------|
|                                     | NDMA<0.126<br>(n=7) | NDMA $\geq$ 0.126<br>(n=18) | NDMA<0.126<br>(n=11) | NDMA $\geq$ 0.126<br>(n=24) |
| Microbial families (% Abundance)    |                     |                             |                      |                             |
| Bifidobacteriaceae                  | 21.36 $\pm$ 12.65   | 9.82 $\pm$ 12.32 *          | 14.39 $\pm$ 12.74    | 9.63 $\pm$ 11.36            |
| Peptostreptococcaceae               | 11.88 $\pm$ 13.01   | 3.77 $\pm$ 3.55             | 3.16 $\pm$ 2.85      | 6.02 $\pm$ 5.95             |
| Prevotellaceae                      | 2.25 $\pm$ 1.96     | 3.87 $\pm$ 7.33 *           | 5.92 $\pm$ 7.37      | 2.91 $\pm$ 8.57             |
| Lachnospiraceae                     | 17.90 $\pm$ 7.18    | 20.57 $\pm$ 7.39            | 17.85 $\pm$ 6.8      | 23.87 $\pm$ 9.34            |
| Coriobacteriaceae                   | 6.05 $\pm$ 2.72     | 6.17 $\pm$ 4.63             | 11.89 $\pm$ 9.91     | 9.59 $\pm$ 8.75             |
| Enterobacteriaceae                  | 1.67 $\pm$ 3.56     | 3.50 $\pm$ 5.58             | 0.40 $\pm$ 0.48      | 1.39 $\pm$ 3.32             |
| Bacteroidaceae                      | 2.08 $\pm$ 1.28     | 6.07 $\pm$ 7.79             | 3.83 $\pm$ 3.42      | 4.55 $\pm$ 4.90             |
| Ruminococcaceae                     | 10.71 $\pm$ 3.95    | 13.10 $\pm$ 4.30            | 10.61 $\pm$ 5.02     | 12.56 $\pm$ 5.57            |
| Veillonellaceae                     | 2.16 $\pm$ 2.35     | 0.97 $\pm$ 1.18             | 3.29 $\pm$ 6.43      | 1.97 $\pm$ 3.99             |
| Akkermansiaceae                     | 0.60 $\pm$ 0.88     | 0.59 $\pm$ 1.12             | 2.26 $\pm$ 5.36      | 1.01 $\pm$ 2.26             |
| Streptococcaceae                    | 3.81 $\pm$ 5.66     | 0.79 $\pm$ 1.21             | 0.54 $\pm$ 0.54      | 1.02 $\pm$ 1.52             |
| Methanobacteriaceae                 | 1.33 $\pm$ 2.51     | 1.92 $\pm$ 2.78             | 1.20 $\pm$ 2.28      | 1.73 $\pm$ 2.94             |
| Eggerthellaceae                     | 2.58 $\pm$ 0.72     | 3.51 $\pm$ 2.22             | 3.92 $\pm$ 2.57      | 4.10 $\pm$ 1.96             |
| Erysipelatoclostridiaceae           | 1.00 $\pm$ 1.49     | 1.23 $\pm$ 1.01             | 0.57 $\pm$ 0.46      | 1.78 $\pm$ 1.88 *           |
| Erysipelotrichaceae                 | 1.40 $\pm$ 1.49     | 1.72 $\pm$ 2.15             | 1.19 $\pm$ 1.64      | 1.65 $\pm$ 2.41             |
| Clostridiaceae                      | 1.03 $\pm$ 0.61     | 0.69 $\pm$ 0.41             | 0.66 $\pm$ 0.56      | 1.17 $\pm$ 0.93             |
| Oscillospiraceae                    | 2.44 $\pm$ 1.33     | 2.72 $\pm$ 1.61             | 2.86 $\pm$ 1.67      | 1.93 $\pm$ 1.51             |
| Christensenellaceae                 | 1.73 $\pm$ 1.03     | 1.56 $\pm$ 1.11             | 1.76 $\pm$ 1.71      | 0.99 $\pm$ 0.83             |
| Eubacterium_coprostanoligenes_group | 1.24 $\pm$ 0.67     | 1.2 $\pm$ 0.56              | 1.03 $\pm$ 0.55      | 1.30 $\pm$ 0.75             |
| Others                              | 6.78 $\pm$ 4.23     | 16.23 $\pm$ 11.97           | 12.66 $\pm$ 8.99     | 10.82 $\pm$ 9.94            |
| SCFAs (mM)                          |                     |                             |                      |                             |
| Acetic acid                         | 43.09 $\pm$ 23.78   | 47.09 $\pm$ 19.35           | 38.22 $\pm$ 16.13    | 55.39 $\pm$ 31.11           |
| Butyric acid                        | 12.48 $\pm$ 10.30   | 13.38 $\pm$ 8.36            | 9.30 $\pm$ 5.50      | 12.87 $\pm$ 8.31            |
| Propionic acid                      | 12.12 $\pm$ 7.53    | 13.66 $\pm$ 6.93            | 13.05 $\pm$ 7.19     | 17.53 $\pm$ 9.43            |
| Isobutyric acid                     | 0.70 $\pm$ 0.74     | 1.00 $\pm$ 1.15             | 1.07 $\pm$ 0.93      | 0.86 $\pm$ 1.13             |
| Isovaleric acid                     | 1.61 $\pm$ 0.92     | 2.17 $\pm$ 1.93             | 2.38 $\pm$ 1.49      | 1.82 $\pm$ 1.54             |
| Valeric acid                        | 1.69 $\pm$ 0.61     | 2.30 $\pm$ 1.79             | 1.65 $\pm$ 0.82      | 1.50 $\pm$ 1.19             |
| Caproic acid                        | 0.65 $\pm$ 0.72     | 0.92 $\pm$ 1.13             | 0.22 $\pm$ 0.38      | 0.29 $\pm$ 0.62             |
| Amino acids (mM)                    |                     |                             |                      |                             |
| Total amino acids                   | 49.60 $\pm$ 17.66   | 48.14 $\pm$ 27.50           | 53.37 $\pm$ 25.19    | 47.18 $\pm$ 21.36           |
| Protein amino acids                 | 48.55 $\pm$ 16.83   | 47.03 $\pm$ 26.46           | 52.83 $\pm$ 24.60    | 45.57 $\pm$ 19.97           |
| Biogenic amines                     | 0.83 $\pm$ 1.28     | 0.99 $\pm$ 1.48             | 0.38 $\pm$ 0.64      | 1.45 $\pm$ 2.36             |
| Ammonium                            | 24.99 $\pm$ 8.27    | 29.88 $\pm$ 19.68           | 34.77 $\pm$ 22.45    | 26.88 $\pm$ 14.34           |

Values are presented as mean  $\pm$  standard deviation. (\*) Differential microbial family abundance according to linear effect size discriminant analysis (LEfSe) at a threshold of 2.0 for the comparison of samples from each category of consumption in diagnosis groups. No significant differences were found by U Mann-Whitney analysis ( $p < 0.05$ ) of metabolites between the two consumption levels. NDMA, N-nitrosodimethylamine; SCFAs, short chain fatty acids.

**Table S18.** Spearman correlation between the relative abundance of Bifidobacteriaceae and faecal SCFAs concentration according to clinical diagnosis group.

| SCFAs (mM)      | Bifidobacteriaceae |         |
|-----------------|--------------------|---------|
|                 | $\rho$             | p-value |
| Control         |                    |         |
| Acetic acid     | -0.208             | 0.319   |
| Butyric acid    | -0.087             | 0.679   |
| Propionic acid  | -0.219             | 0.293   |
| Isobutyric acid | -0.001             | 0.997   |
| Isovaleric acid | 0.037              | 0.861   |
| Valeric acid    | 0.124              | 0.556   |
| Caproic acid    | 0.247              | 0.233   |
| Polyps          |                    |         |
| Acetic acid     | -0.053             | 0.764   |
| Butyric acid    | -0.104             | 0.554   |
| Propionic acid  | 0.018              | 0.916   |
| Isobutyric acid | 0.234              | 0.176   |
| Isovaleric acid | 0.247              | 0.152   |
| Valeric acid    | 0.079              | 0.651   |
| Caproic acid    | -0.293             | 0.088   |

Correlation values are presented as Spearman's rank correlation coefficient ( $\rho$ ) and its associated p-value.
